# Supplementary material
Source: PubMed Central journal article supplement (PMC11533588)
Supplement: NIHMS1924044-supplement-st1.pdf [file NIHMS1924044-supplement-st1.pdf]

Supplemental Table 1: Haplotype-level allele-specific chromatin accessibility measures using ATAC-seq and DHS-seq data aggregated across three heterozygous adipocyte lines. For each line of an individual heterozygous for the haplotype, the number of reads aggregated across 19 non-coding SNPs in the haplotype, are shown.

| Heterozygous line | Measure  | strandBias | Haplotype_1_Count | Haplotype_2_Count |
|-------------------|----------|------------|-------------------|-------------------|
| hWAT              | ATAC-seq | 0.5957447  | 47                | 0                 |
| MSC               | DHS-seq  | 0.5909091  | 29                | 15                |
| AMSC              | ATAC-seq | 0.475      | 50                | 30                |
