# Supplementary material
Source: PubMed Central journal article supplement (PMC11533588)
Supplement: NIHMS1924044-supplement-st2.pdf [file NIHMS1924044-supplement-st2.pdf]

Supplemental Table 2: SNP-level allele-specific chromatin accessibility measures at the haplotype using ATAC-seq data aggregated across three heterozygous MSC lines.

| SNP        | Haplotype_1_SNP_Count | Haplotype_2_SNP_Count |
|------------|-----------------------|-----------------------|
| rs10179126 | 45                    | 15                    |
| rs10184004 | 1                     | 1                     |
| rs10187501 | 3                     | 0                     |
| rs10195252 | 0                     | 1                     |
| rs10930133 | 3                     | 0                     |
| rs12692735 | 4                     | 2                     |
| rs12692737 | 13                    | 4                     |
| rs13432797 | 5                     | 2                     |
| rs2198550  | 5                     | 1                     |
| rs36105243 | 3                     | 3                     |
| rs3923113  | 3                     | 0                     |
| rs6712203  | 16                    | 7                     |
| rs6713419  | 6                     | 0                     |
| rs6738627  | 3                     | 1                     |
| rs6752978  | 1                     | 2                     |
| rs6753142  | 3                     | 0                     |
| rs6754919  | 1                     | 3                     |
| rs7592412  | 5                     | 2                     |
| rs7609045  | 4                     | 1                     |
| rs9653282  | 2                     | 0                     |
