# Supplementary material
Source: PubMed Central journal article supplement (PMC11533588)
Supplement: NIHMS1924044-supplement-st3.pdf [file NIHMS1924044-supplement-st3.pdf]

Supplemental Table 3: FMCA results for SNPs at the 2q24.3 locus using the 20-way alignments of mammals, reproduced from Clausnitzer et al. 2014.  $r^2$  summary statistic as in Clausnitzer et al. 2014.  $r^2$  Mrestr, number of TF motifs in restricted modules (>50% conservation), TFMI, transcription factor motifs in all modules; TF, number of TF motifs conserved across >50% of species regardless of modules; Modules, number of TF modules total

| SNP        | LD (r <sup>2</sup> ) | LD (D) | chromosome | position  | A1 | A2 | AF   | WTFBS | p-estTFBS | Wmodules | p-estmodules | WTFBS_in_modul | p-estTFBS_in_mod | Wrestr-TFBS | p-estestr-TFBS | Wrestr-modules | p-estestr-module | Wrestr-TFBS_in_rp | p-estestr-TFBS_in | Srestr-all |          |     |          |       |
|------------|----------------------|--------|------------|-----------|----|----|------|-------|-----------|----------|--------------|----------------|------------------|-------------|----------------|----------------|------------------|-------------------|-------------------|------------|----------|-----|----------|-------|
| rs10195252 | 0.84                 | 0.99   | chr2       | 164656581 | T  | C  | 0.79 | 0.29  | 0.1       | 0.42     | 38           | 0.004          | 14347            | 0.000998    | 185            | 0.000998       | 8.4              | 17                | 0.000998          | 12         | 0.000998 | 14  | 0.000998 | 9     |
| rs10187501 | 0.9                  | 0.96   | chr2       | 164675944 | A  | G  | 0.71 | 0.27  | 0.08      | 0.38     | 122          | 0.019          | 68577            | 0.000998    | 549            | 0.000998       | 7.72             | 37                | 0.000998          | 114        | 0.000998 | 61  | 0.000998 | 9     |
| rs6753142  | 0.87                 | 0.95   | chr2       | 164687561 | T  | C  | 0.74 | 0.27  | 0.11      | 0.39     | 53           | 0.000998       | 61330            | 0.000998    | 356            | 0.000998       | 9                | 21                | 0.000998          | 1332       | 0.000998 | 107 | 0.000998 | 9     |
| rs9712203  | 0.82                 | 0.94   | chr2       | 164700808 | C  | T  | 0.76 | 0.28  | 0.11      | 0.4      | 460          | 0.000999       | 146577           | 0.000998    | 1716           | 0.000998       | 9                | 312               | 0.000998          | 32402      | 0.000998 | 763 | 0.000998 | 9     |
| rs10179126 | 0.95                 | 0.98   | chr2       | 164655284 | C  | G  | 0.76 | 0.28  | 0.11      | 0.38     | 43           | 0.0549         | 632              | 0.000998    | 89             | 0.000998       | 7.26             | 15                | 0.000999          | 2          | 0.000998 | 3   | 0.000999 | 8     |
| rs2198550  | 0.84                 | 0.92   | chr2       | 164700250 | A  | C  | 0.71 | 0.28  | 0.08      | 0.38     | 104          | 0.22           | 63018            | 0.000998    | 364            | 0.011          | 5.62             | 56                | 0.164             | 188        | 0.000998 | 72  | 0.003    | 6.31  |
| rs6752978  | 0.84                 | 0.92   | chr2       | 164666432 | G  | T  | 0.72 | 0.27  | 0.08      | 0.38     | 59           | 0.393          | 54199            | 0.000998    | 251            | 0.00699        | 5.56             | 28                | 0.253             | 15         | 0.005    | 18  | 0.00699  | 5.05  |
| rs7592412  | 0.91                 | 0.97   | chr2       | 164669828 | T  | C  | 0.76 | 0.28  | 0.1       | 0.38     | 270          | 0.158          | 128218           | 0.000998    | 847            | 0.000998       | 6.8              | 77                | 0.131             | 6          | 0.00799  | 9   | 0.031    | 4.49  |
| rs12662737 | 0.84                 | 0.92   | chr2       | 164697799 | C  | A  | 0.71 | 0.27  | 0.08      | 0.38     | 138          | 0.179          | 77617            | 0.000998    | 502            | 0.000998       | 6.75             | 38                | 0.212             | 2          | 0.0949   | 3   | 0.0979   | 2.71  |
| rs12662735 | 0.96                 | 0.99   | chr2       | 164648055 | G  | T  | 0.76 | 0.28  | 0.1       | 0.39     | 27           | 0.491          | 3514             | 0.000998    | 131            | 0.002          | 6.01             | 8                 | 0.503             | 1          | 0.103    | 2   | 0.103    | 2.27  |
| rs10930133 | 0.97                 | 0.99   | chr2       | 164652214 | T  | A  | 0.76 | 0.28  | 0.11      | 0.39     | 104          | 0.353          | 56405            | 0.000998    | 417            | 0.000998       | 6.45             | 24                | 0.426             | 11         | 0.175    | 2   | 0.175    | 1.89  |
| rs6713419  | 0.97                 | 0.99   | chr2       | 164651790 | T  | C  | 0.76 | 0.29  | 0.11      | 0.39     | 79           | 0.113          | 57172            | 0.000998    | 338            | 0.000998       | 6.95             | 22                | 0.043             | 0          | 1        | 0   | 1        | 1.37  |
| rs13432797 | 0.9                  | 0.97   | chr2       | 164670077 | G  | C  | 0.71 | 0.27  | 0.09      | 0.37     | 96           | 0.551          | 1249             | 0.000998    | 136            | 0.042          | 4.64             | 42                | 0.45              | 1          | 0.312    | 2   | 0.312    | 1.36  |
| rs36105243 | 0.91                 | 0.97   | chr2       | 164668241 | C  | G  | 0.76 | 0.28  | 0.09      | 0.38     | 98           | 0.24           | 95152            | 0.000998    | 547            | 0.000998       | 6.62             | 7                 | 0.0809            | 0          | 1        | 0   | 1        | 1.09  |
| rs3923113  | 1                    | 1      | chr2       | 164645339 | A  | C  | 0.76 | 0.29  | 0.12      | 0.38     | 98           | 0.24           | 95152            | 0.000998    | 547            | 0.000998       | 6.62             | 7                 | 0.0809            | 0          | 1        | 0   | 1        | 1.09  |
| rs10184004 | 0.85                 | 0.99   | chr2       | 164651679 | C  | T  | 0.79 | 0.3   | 0.11      | 0.42     | 70           | 0.02           | 81627            | 0.000998    | 406            | 0.000998       | 7.7              | 8                 | 0.3689            | 0          | 1        | 0   | 1        | 1.05  |
| rs6738627  | 0.87                 | 0.95   | chr2       | 164687940 | G  | A  | 0.76 | 0.28  | 0.11      | 0.39     | 100          | 0.244          | 48266            | 0.000998    | 321            | 0.000999       | 6.61             | 11                | 0.132             | 0          | 1        | 0   | 1        | 0.717 |
| rs6754919  | 0.97                 | 0.99   | chr2       | 164651333 | C  | T  | 0.76 | 0.28  | 0.11      | 0.39     | 56           | 0.413          | 1664             | 0.000998    | 130            | 0.00599        | 5.61             | 14                | 0.24              | 0          | 1        | 0   | 1        | 0.62  |
| rs7609045  | 0.84                 | 0.92   | chr2       | 164688697 | G  | A  | 0.71 | 0.27  | 0.08      | 0.38     | 104          | 0.283          | 50311            | 0.000998    | 386            | 0.00699        | 5.7              | 7                 | 0.386             | 0          | 1        | 0   | 1        | 0.414 |
| rs9653282  | 0.83                 | 0.92   | chr2       | 164688148 | A  | T  | 0.71 | 0.27  | 0.08      | 0.39     | 108          | 0.629          | 99245            | 0.000998    | 521            | 0.00599        | 5.42             | 14                | 0.629             | 0          | 1        | 0   | 1        | 0.201 |
