# Supplementary material
Source: PubMed Central journal article supplement (PMC11533588)
Supplement: NIHMS1924044-supplement-st4.pdf [file NIHMS1924044-supplement-st4.pdf]

Supplemental Table 4: Single-SNP estimated chromatin accessibility using the sequence-to-accessibility model trained with Basset. SNP, variant ID; allele, which allele at the variant; Adipocyte\_D0, the predicted accessibility at day 0 of differentiation; likewise for day 3 (D3), day 6 (D6), and day 24 (D24). Input data are in vitro differentiated hWAT cell lines.

| SNP        | allele | Adipocyte_D0 | Adipocyte_D3 | Adipocyte_D6 | Adipocyte_D24 |
|------------|--------|--------------|--------------|--------------|---------------|
| rs3923113  | A      | 0.3012986481 | 0.2637622356 | 0.4326980412 | 0.462831974   |
| rs12692735 | G      | 0.3183937669 | 0.2642213702 | 0.4212688208 | 0.4708552957  |
| rs10930133 | T      | 0.4359104633 | 0.3179957271 | 0.4530633092 | 0.3903269768  |
| rs6754919  | C      | 0.3462015986 | 0.2921434641 | 0.4498663843 | 0.5148968101  |
| rs6713419  | T      | 0.3133978248 | 0.2670628428 | 0.4295437336 | 0.4776082039  |
| rs10184004 | C      | 0.4402422905 | 0.3726520538 | 0.5202207565 | 0.5865828395  |
| rs10179126 | C      | 0.3789185882 | 0.3244315386 | 0.4820067286 | 0.5578770638  |
| rs10195252 | T      | 0.3409407139 | 0.2632956803 | 0.4179425538 | 0.5177072287  |
| rs36105243 | C      | 0.3662378788 | 0.2853382826 | 0.4168099761 | 0.5141431093  |
| rs7592412  | T      | 0.2855495214 | 0.2376130968 | 0.3971697986 | 0.3950099945  |
| rs13432797 | G      | 0.300332129  | 0.2503347397 | 0.409622252  | 0.424964726   |
| rs10187501 | A      | 0.3357825875 | 0.2878235579 | 0.4504722059 | 0.5130640268  |
| rs6753142  | T      | 0.3264520466 | 0.2502553463 | 0.3911416829 | 0.4977773428  |
| rs6738627  | G      | 0.3508650661 | 0.2924869657 | 0.4486387074 | 0.491871655   |
| rs6752978  | G      | 0.2946702838 | 0.2473187447 | 0.4078712463 | 0.4276474416  |
| rs12692737 | C      | 0.330368638  | 0.2719791532 | 0.4264187813 | 0.4745532274  |
| rs9653282  | A      | 0.2981992662 | 0.2512871623 | 0.4122974277 | 0.4302435219  |
| rs7609045  | G      | 0.3045986295 | 0.2619801164 | 0.4270417094 | 0.4572304487  |
| rs2198550  | A      | 0.3408390284 | 0.2783777714 | 0.43195346   | 0.4524995685  |
| rs6712203  | C      | 0.3166695833 | 0.266192019  | 0.4262803495 | 0.4515125751  |
| rs3923113  | C      | 0.3038298488 | 0.2629087567 | 0.4293902814 | 0.4610806704  |
| rs12692735 | T      | 0.3187352419 | 0.264909029  | 0.4222737551 | 0.4766898751  |
| rs10930133 | A      | 0.4310770631 | 0.3151788712 | 0.4511503577 | 0.3898441792  |
| rs6754919  | T      | 0.3598468304 | 0.3046268821 | 0.4624396563 | 0.5331318378  |
| rs6713419  | C      | 0.3064364195 | 0.259860754  | 0.4217080474 | 0.4648057222  |
| rs10184004 | T      | 0.421010077  | 0.3552680612 | 0.5056725144 | 0.5719507337  |
| rs10179126 | G      | 0.3805683255 | 0.3257252574 | 0.4838429093 | 0.5536356568  |
| rs10195252 | C      | 0.3453243971 | 0.2650900185 | 0.4204302728 | 0.5246045589  |
| rs36105243 | G      | 0.3736087084 | 0.2917791009 | 0.4215548635 | 0.5153160095  |
| rs7592412  | C      | 0.2900768816 | 0.242292732  | 0.402309835  | 0.4041995406  |
| rs13432797 | C      | 0.318072319  | 0.2644696236 | 0.4221687317 | 0.4463353753  |
| rs10187501 | G      | 0.3971172571 | 0.3413336873 | 0.4995294213 | 0.5677361488  |
| rs6753142  | C      | 0.3178634942 | 0.240077734  | 0.3806167245 | 0.4913172126  |
| rs6738627  | A      | 0.3406077027 | 0.2819049656 | 0.4370760322 | 0.4730195999  |
| rs6752978  | T      | 0.2928290963 | 0.2463277578 | 0.4073423147 | 0.425124526   |
| rs12692737 | A      | 0.3217048049 | 0.2644443512 | 0.4195795059 | 0.4610426426  |
| rs9653282  | T      | 0.3040152788 | 0.2573944628 | 0.4190728068 | 0.4416792691  |
| rs7609045  | A      | 0.2993785143 | 0.2558018565 | 0.4196710587 | 0.4458961487  |
| rs2198550  | C      | 0.3382745981 | 0.2747836709 | 0.4278264046 | 0.4446313381  |
| rs6712203  | T      | 0.3527002633 | 0.2972133756 | 0.4589754343 | 0.4827680588  |
