# Supplementary material
Source: PubMed Central journal article supplement (PMC11533588)
Supplement: NIHMS1924044-supplement-st6.pdf [file NIHMS1924044-supplement-st6.pdf]

Supplemental Table 6: BMI dependence of association of type 2 diabetes and waist to hip ratio with 2q24.3 tag SNP rs10195252 in White British individuals in the UK Biobank. Normal weight and underweight, BMI < 25; overweight, 25 <= BMI < 30; obese, BMI >= 30. BMI, body mass index; FHD, family history of diabetes; T2D, type 2 diabetes; WHR, waist-to-hip ratio.

| Subset            | Trait | N      | Beta        | SE          | Z         | P-value     |
|-------------------|-------|--------|-------------|-------------|-----------|-------------|
| All               | BMI   | 327313 | -0.0639857  | 0.011854    | -5.3978   | 6.75E-08    |
| All               | FHD   | 327313 | 1.03907     | 0.00669397  | 5.72552   | 1.03E-08    |
| All               | T2D   | 327313 | 1.07552     | 0.0132507   | 5.49434   | 3.92E-08    |
| All               | WHR   | 327230 | 0.00165517  | 0.000166054 | 9.96762   | 2.13E-23    |
| Normal weight and | BMI   | 108955 | 0.000155046 | 0.00708791  | 0.0218747 | 0.982548    |
| Normal weight and | FHD   | 108955 | 1.03443     | 0.0125902   | 2.6887    | 0.00717306  |
| Normal weight and | T2D   | 108955 | 1.13367     | 0.0460689   | 2.72337   | 0.006462    |
| Normal weight and | WHR   | 108934 | 0.00257923  | 0.000238424 | 10.8178   | 2.93E-27    |
| Overweight        | BMI   | 140296 | 0.00199729  | 0.00540788  | 0.36933   | 0.711882    |
| Overweight        | FHD   | 140296 | 1.0509      | 0.0102972   | 4.82115   | 1.43E-06    |
| Overweight        | T2D   | 140296 | 1.12737     | 0.0232461   | 5.15725   | 2.51E-07    |
| Overweight        | WHR   | 140273 | 0.00178306  | 0.000215508 | 8.27374   | 1.31E-16    |
| Obese             | BMI   | 78062  | -0.101753   | 0.0194411   | -5.23388  | 1.66E-07    |
| Obese             | FHD   | 78062  | 1.03399     | 0.0124783   | 2.67886   | 0.00738729  |
| Obese             | T2D   | 78062  | 1.0626      | 0.0176942   | 3.4314    | 0.000600463 |
| Obese             | WHR   | 78023  | 0.0012632   | 0.000316958 | 3.9854    | 6.74E-05    |
