# Supplementary material
Source: PubMed Central journal article supplement (PMC11533588)
Supplement: NIHMS1924044-supplement-st7.pdf [file NIHMS1924044-supplement-st7.pdf]

Supplemental Table 7: List of genes with significant co-expression (q-value < 0.001, abs(estimate) > 0.1 and < 10 to exclude very low expression and housekeeping genes) with COBLL1 across cohort of 30 differentiating primary human adipocyte lines. Estimate betas provided by linear regression with adjustment for 10 expression TPM (log-transformed) principal components, day of differentiation, depot source, and donor as covariates.

| estimate      | std.error     | statistic    | p.value  | gene    | q.value  |
|---------------|---------------|--------------|----------|---------|----------|
| 0.1235372101  | 0.01896310591 | 6.514608456  | 5.44E-10 | ACVR1B  | 6.72E-08 |
| 0.2784986247  | 0.03505571686 | 7.9444567    | 1.23E-13 | ADGRF5  | 3.80E-11 |
| -0.3452414842 | 0.0518181189  | -6.662563048 | 2.39E-10 | AIF1    | 3.23E-08 |
| 0.2323918826  | 0.03702349828 | 6.276875319  | 1.99E-09 | AKTIP   | 2.17E-07 |
| 0.445746999   | 0.0759948165  | 5.865492142  | 1.75E-08 | ANGPT1  | 1.42E-06 |
| 0.1721900858  | 0.02927217502 | 5.882380988  | 1.61E-08 | ANKRD40 | 1.32E-06 |
| 0.605316806   | 0.09448956546 | 6.406176206  | 9.87E-10 | ANO6    | 1.16E-07 |
| 0.6633933121  | 0.09670938707 | 6.859657911  | 7.83E-11 | APBB2   | 1.25E-08 |
| 0.1635001047  | 0.02722170019 | 6.006241476  | 8.42E-09 | APPBP2  | 7.69E-07 |
| 0.1482114923  | 0.02552087308 | 5.807461673  | 2.36E-08 | AQP7P1  | 1.85E-06 |
| 0.3928864917  | 0.03223270654 | 12.18906303  | 4.09E-26 | ARHGEF6 | 4.58E-22 |
| 0.5448457735  | 0.07084492948 | 7.690681288  | 5.83E-13 | ARHGEF7 | 1.50E-10 |
| 0.3147792452  | 0.05363071507 | 5.869383706  | 1.72E-08 | ARPP19  | 1.40E-06 |
| 0.1254778507  | 0.01860901259 | 6.74285377   | 1.52E-10 | ATF7    | 2.18E-08 |
| 0.304335531   | 0.03864904594 | 7.874334893  | 1.90E-13 | ATP11B  | 5.54E-11 |
| 0.3744625269  | 0.06331462667 | 5.914313115  | 1.36E-08 | BCL2L13 | 1.15E-06 |
| 0.3000208488  | 0.04977791302 | 6.027188176  | 7.54E-09 | BNIP2   | 7.06E-07 |
| 3.233712959   | 0.4508431331  | 7.172590024  | 1.28E-11 | BTNL9   | 2.40E-09 |
| 0.3482182668  | 0.05622132518 | 6.193704358  | 3.12E-09 | CA4     | 3.20E-07 |
| 0.2677463048  | 0.04026447487 | 6.649690718  | 2.56E-10 | CAB39L  | 3.43E-08 |
| 0.1800489848  | 0.01931134188 | 9.323483884  | 1.75E-17 | CCDC170 | 1.62E-14 |
| 0.5258935303  | 0.07139291602 | 7.366186445  | 4.10E-12 | CD300LG | 8.56E-10 |
| -0.1469328301 | 0.02445803619 | -6.007548152 | 8.36E-09 | CD37    | 7.66E-07 |
| -0.2879581144 | 0.03663588743 | -7.86000107  | 2.07E-13 | CD53    | 5.95E-11 |
| 0.7729262398  | 0.1151160342  | 6.71432303   | 1.78E-10 | CDV3    | 2.51E-08 |
| 0.2505080614  | 0.04338430515 | 5.774163273  | 2.80E-08 | CHST3   | 2.14E-06 |

|               |               |                  |          |          |          |
|---------------|---------------|------------------|----------|----------|----------|
| 1             | 2.23E-17      | 4486374638962836 | 0        | COBLL1   | 0        |
| 0.2168334737  | 0.03324024876 | 6.523220547      | 5.18E-10 | COMMD2   | 6.52E-08 |
| 0.1455150765  | 0.02373776868 | 6.130107615      | 4.38E-09 | CRHBP    | 4.33E-07 |
| 0.2349610882  | 0.03773826712 | 6.226069878      | 2.62E-09 | CRK      | 2.76E-07 |
| 3.033158688   | 0.3314008411  | 9.152537688      | 5.42E-17 | CSDE1    | 3.88E-14 |
| 0.1664324876  | 0.02619445567 | 6.353729573      | 1.31E-09 | CTNNBIP1 | 1.49E-07 |
| 0.2089755665  | 0.02965458176 | 7.046990854      | 2.67E-11 | DAPK2    | 4.67E-09 |
| 0.2111038372  | 0.03135649359 | 6.732380219      | 1.61E-10 | DLG1     | 2.30E-08 |
| 0.1073734234  | 0.01131122451 | 9.492643639      | 5.67E-18 | DMRT2    | 8.67E-15 |
| 0.1080210027  | 0.01868307256 | 5.781757919      | 2.70E-08 | DOP1A    | 2.07E-06 |
| 0.1616324361  | 0.02402431075 | 6.727869855      | 1.65E-10 | DSG2     | 2.34E-08 |
| 0.2123892575  | 0.03126448303 | 6.793307833      | 1.14E-10 | DTD2     | 1.71E-08 |
| 0.5460067667  | 0.07291296588 | 7.488472868      | 1.98E-12 | DYNC1LI2 | 4.52E-10 |
| 0.4732675249  | 0.07960418287 | 5.945259506      | 1.16E-08 | ECE1     | 1.00E-06 |
| 0.1752097672  | 0.02746486675 | 6.379414428      | 1.14E-09 | EFCAB14  | 1.32E-07 |
| 0.1843803604  | 0.02784595164 | 6.62144224       | 3.00E-10 | EOGT     | 3.96E-08 |
| 0.246789239   | 0.01972827333 | 12.50941909      | 4.13E-27 | EPB41L4B | 6.94E-23 |
| 0.3823488538  | 0.0513555977  | 7.445125185      | 2.56E-12 | ESYT1    | 5.66E-10 |
| 0.1681564468  | 0.02800425227 | 6.004675474      | 8.49E-09 | ETV3     | 7.71E-07 |
| 0.215704432   | 0.02952780752 | 7.305128625      | 5.89E-12 | FAM13B   | 1.20E-09 |
| 0.1933707999  | 0.03172893687 | 6.094461996      | 5.29E-09 | FAM160B1 | 5.11E-07 |
| 0.2289016499  | 0.02859956129 | 8.003676965      | 8.53E-14 | FBXW2    | 2.84E-11 |
| -0.4161430392 | 0.06679852859 | -6.22982344      | 2.57E-09 | FCER1G   | 2.71E-07 |
| 2.140486334   | 0.2315559765  | 9.243926097      | 2.97E-17 | FERMT2   | 2.27E-14 |
| 0.1383351579  | 0.0200771602  | 6.89017553       | 6.58E-11 | FGF13    | 1.07E-08 |
| 0.1051839461  | 0.01544745674 | 6.80914327       | 1.04E-10 | FGFR2    | 1.57E-08 |
| 0.2506706134  | 0.04106422416 | 6.104355276      | 5.02E-09 | FMO3     | 4.89E-07 |
| 0.1288027092  | 0.0175940365  | 7.320816303      | 5.37E-12 | FOXN2    | 1.11E-09 |
| 0.6342919631  | 0.1043158546  | 6.080494337      | 5.69E-09 | GCLC     | 5.45E-07 |
| 0.2176690038  | 0.03396125514 | 6.409333308      | 9.70E-10 | GDPD5    | 1.15E-07 |
| 0.135605273   | 0.01781972097 | 7.609842667      | 9.52E-13 | GJA4     | 2.32E-10 |

|               |               |              |                   |          |
|---------------|---------------|--------------|-------------------|----------|
| 0.3321307365  | 0.04847028029 | 6.852255331  | 8.17E-11 GLYAT    | 1.28E-08 |
| 0.9036607637  | 0.09460632118 | 9.551801111  | 3.82E-18 GNAI1    | 6.75E-15 |
| 0.3002579533  | 0.0517804087  | 5.798678706  | 2.47E-08 GPIHBP1  | 1.92E-06 |
| 0.2496734992  | 0.04274737072 | 5.840674994  | 1.99E-08 HEATR5A  | 1.59E-06 |
| 0.1053198192  | 0.01507609752 | 6.985880737  | 3.80E-11 HEPACAM  | 6.48E-09 |
| 0.235234107   | 0.03079046818 | 7.639835344  | 7.94E-13 HIPK3    | 1.99E-10 |
| 0.1340271756  | 0.02256110882 | 5.940628925  | 1.19E-08 HPS5     | 1.02E-06 |
| 0.1225826105  | 0.01793354535 | 6.835380744  | 8.99E-11 HSD17B13 | 1.39E-08 |
| 0.4531418147  | 0.06567741132 | 6.899507846  | 6.24E-11 ID4      | 1.02E-08 |
| 0.1625389778  | 0.01614827192 | 10.06541     | 1.18E-19 IGHV3-7  | 3.98E-16 |
| 0.3106445169  | 0.053402853   | 5.817002267  | 2.25E-08 IRS2     | 1.77E-06 |
| 0.4198522033  | 0.05194980844 | 8.081881646  | 5.25E-14 ITGA1    | 1.88E-11 |
| -0.1923560631 | 0.03247969732 | -5.922347774 | 1.31E-08 ITGAM    | 1.11E-06 |
| 3.423504735   | 0.5845841258  | 5.856308073  | 1.84E-08 ITIH5    | 1.48E-06 |
| 0.2794054946  | 0.04840020921 | 5.772815845  | 2.82E-08 ITPK1    | 2.15E-06 |
| 1.237137166   | 0.1292681232  | 9.570318931  | 3.37E-18 ITSN1    | 6.30E-15 |
| 0.2963188082  | 0.03562004896 | 8.318877059  | 1.18E-14 KANK1    | 5.04E-12 |
| 0.1173619094  | 0.01735729585 | 6.761531891  | 1.37E-10 KCTD18   | 2.00E-08 |
| 0.3575449385  | 0.06047288871 | 5.912483199  | 1.37E-08 KCTD20   | 1.15E-06 |
| 0.2317975832  | 0.03665963717 | 6.322964465  | 1.55E-09 KIAA1109 | 1.73E-07 |
| 0.2168069462  | 0.03043285035 | 7.124109104  | 1.70E-11 LATS2    | 3.06E-09 |
| 3.966395581   | 0.4809029358  | 8.24780904   | 1.86E-14 LEP      | 7.42E-12 |
| 0.4987032369  | 0.06346020849 | 7.858518728  | 2.09E-13 LIMCH1   | 5.96E-11 |
| 0.2600337338  | 0.04290246334 | 6.061044368  | 6.31E-09 LIMS2    | 5.99E-07 |
| 0.8141667082  | 0.1193708823  | 6.820479938  | 9.79E-11 LMOD1    | 1.49E-08 |
| 0.3308272651  | 0.05528055226 | 5.984514474  | 9.44E-09 LNPEP    | 8.43E-07 |
| 0.1593282996  | 0.02683933227 | 5.936373454  | 1.21E-08 LPGAT1   | 1.04E-06 |
| 0.4106483378  | 0.06461069122 | 6.355733549  | 1.30E-09 LRP5     | 1.49E-07 |
| 0.3079807342  | 0.04442109886 | 6.933208366  | 5.14E-11 MAP4K3   | 8.55E-09 |
| 0.9528795079  | 0.1360872834  | 7.001973177  | 3.46E-11 MBNL1    | 5.96E-09 |
| 0.1220350624  | 0.01671154329 | 7.302441212  | 5.98E-12 MBNL3    | 1.21E-09 |

|              |               |             |                   |          |
|--------------|---------------|-------------|-------------------|----------|
| 0.5017986329 | 0.07586188369 | 6.614634498 | 3.12E-10 MSRB3    | 4.05E-08 |
| 0.6036884285 | 0.08330500211 | 7.246724845 | 8.31E-12 MTIF3    | 1.61E-09 |
| 0.1629180207 | 0.02375781542 | 6.857449552 | 7.93E-11 MTMR12   | 1.25E-08 |
| 0.8313086822 | 0.1431671138  | 5.806561719 | 2.37E-08 MTURN    | 1.85E-06 |
| 0.4293355538 | 0.05917298562 | 7.255600666 | 7.89E-12 NBPF19   | 1.57E-09 |
| 2.4104225    | 0.3305372224  | 7.292438905 | 6.35E-12 NFE2L1   | 1.28E-09 |
| 0.7073417357 | 0.06215752769 | 11.37982417 | 1.28E-23 NPY1R    | 8.61E-20 |
| 0.23988759   | 0.03647123617 | 6.577446099 | 3.84E-10 NRIP1    | 4.90E-08 |
| 0.5785475441 | 0.0918547375  | 6.298505225 | 1.77E-09 OSBPL9   | 1.95E-07 |
| 0.2891957256 | 0.04532162596 | 6.380965367 | 1.13E-09 OSGIN2   | 1.31E-07 |
| 0.1189921503 | 0.01323045127 | 8.993808894 | 1.54E-16 OTUD7B   | 1.03E-13 |
| 0.3943573867 | 0.06140337976 | 6.42240522  | 9.03E-10 PAIP1    | 1.08E-07 |
| 0.979084729  | 0.1678157158  | 5.834285093 | 2.06E-08 PALMD    | 1.64E-06 |
| 0.121262333  | 0.01815926607 | 6.677711119 | 2.19E-10 PARM1    | 3.03E-08 |
| 0.2998826605 | 0.04187108937 | 7.162045817 | 1.37E-11 PBRM1    | 2.54E-09 |
| 0.6136512156 | 0.08691127314 | 7.060663058 | 2.46E-11 PEAK1    | 4.36E-09 |
| 1.367753044  | 0.226106507   | 6.049153834 | 6.72E-09 PICALM   | 6.34E-07 |
| 0.2036933884 | 0.03167210135 | 6.43131904  | 8.60E-10 PIK3CA   | 1.03E-07 |
| 7.441090414  | 1.235249224   | 6.023958786 | 7.67E-09 PLIN1    | 7.16E-07 |
| 0.1937366594 | 0.0283964775  | 6.822559575 | 9.67E-11 POLI     | 1.48E-08 |
| 0.2201775238 | 0.03638079522 | 6.052026146 | 6.62E-09 PPM1A    | 6.26E-07 |
| 2.622061326  | 0.3288462409  | 7.97351771  | 1.03E-13 PPP1R14A | 3.29E-11 |
| 0.183990649  | 0.02980803456 | 6.172518641 | 3.49E-09 PTBP2    | 3.54E-07 |
| 0.5177208042 | 0.08406007333 | 6.158938289 | 3.75E-09 PTGER3   | 3.76E-07 |
| 0.1723662564 | 0.0226074144  | 7.624324185 | 8.72E-13 PTPN21   | 2.16E-10 |
| 0.5145519418 | 0.06619192608 | 7.773636034 | 3.52E-13 PTPRM    | 9.54E-11 |
| 2.777613616  | 0.3550837475  | 7.822418333 | 2.61E-13 PXDN     | 7.25E-11 |
| 0.2106628028 | 0.03570562354 | 5.899989466 | 1.47E-08 RANBP9   | 1.22E-06 |
| 0.2809032569 | 0.04665600359 | 6.020731209 | 7.80E-09 RBM28    | 7.24E-07 |
| 1.76529664   | 0.2622231062  | 6.732040762 | 1.61E-10 RDH10    | 2.30E-08 |
| 0.2976569491 | 0.04697806362 | 6.336083826 | 1.45E-09 RHOBTB1  | 1.63E-07 |

|              |               |             |                   |          |
|--------------|---------------|-------------|-------------------|----------|
| 0.6610626712 | 0.06709010067 | 9.853356376 | 5.01E-19 RIMKLB   | 1.12E-15 |
| 0.3895585519 | 0.06468143069 | 6.022726271 | 7.72E-09 RNF41    | 7.19E-07 |
| 0.6814796213 | 0.1146205702  | 5.94552636  | 1.16E-08 ROCK2    | 1.00E-06 |
| 0.2255872954 | 0.03382494368 | 6.669258566 | 2.30E-10 SAMD8    | 3.14E-08 |
| 0.8998732959 | 0.1298422095  | 6.930514345 | 5.22E-11 SBDS     | 8.64E-09 |
| 0.496386584  | 0.07433563011 | 6.677640094 | 2.19E-10 SBDSP1   | 3.03E-08 |
| 0.1130194806 | 0.01798852922 | 6.282863886 | 1.93E-09 SCN4A    | 2.11E-07 |
| 0.1631323756 | 0.01939190549 | 8.412395354 | 6.55E-15 SCTR     | 3.06E-12 |
| 0.5803283026 | 0.07843025704 | 7.399291097 | 3.37E-12 SEL1L    | 7.21E-10 |
| 1.807970931  | 0.2503307139  | 7.222329627 | 9.59E-12 SEPTIN11 | 1.83E-09 |
| 0.1468172112 | 0.0205311296  | 7.150956331 | 1.46E-11 SEPTIN4  | 2.66E-09 |
| 1.465272751  | 0.225156808   | 6.507787901 | 5.65E-10 SERINC1  | 6.95E-08 |
| 0.338346773  | 0.0453550166  | 7.459963602 | 2.35E-12 SIAH1    | 5.22E-10 |
| 0.1049608721 | 0.01815411937 | 5.781655944 | 2.70E-08 SIX1     | 2.07E-06 |
| 1.244822049  | 0.1226083057  | 10.15283623 | 6.51E-20 SLC19A3  | 2.74E-16 |
| 0.1942328296 | 0.02433734158 | 7.980856455 | 9.83E-14 SLC31A2  | 3.21E-11 |
| 0.5563005097 | 0.09046687227 | 6.149217893 | 3.95E-09 SLC44A2  | 3.92E-07 |
| 0.2150573233 | 0.02702745557 | 7.956994796 | 1.14E-13 SNRK     | 3.55E-11 |
| 0.1478051887 | 0.02418622116 | 6.111131941 | 4.84E-09 SPIRE1   | 4.73E-07 |
| 2.422807191  | 0.3130567929  | 7.739193802 | 4.34E-13 SPTBN1   | 1.15E-10 |
| 0.4659669495 | 0.07283674388 | 6.397415983 | 1.04E-09 STX12    | 1.21E-07 |
| 0.570405778  | 0.06744595455 | 8.457227447 | 4.92E-15 STX7     | 2.33E-12 |
| 0.7067442033 | 0.09381043468 | 7.533748306 | 1.51E-12 SYNPO2   | 3.52E-10 |
| 0.1801323149 | 0.02049785187 | 8.787863042 | 5.88E-16 TBC1D9   | 3.35E-13 |
| 0.8044033754 | 0.0758609513  | 10.60365526 | 2.92E-21 TCF7L2   | 1.40E-17 |
| 0.3605814251 | 0.04327047576 | 8.333197608 | 1.08E-14 TEAD1    | 4.79E-12 |
| 0.7173832277 | 0.07552466393 | 9.498661633 | 5.45E-18 THBS4    | 8.67E-15 |
| 0.5375355387 | 0.09003125411 | 5.970543719 | 1.02E-08 TINAGL1  | 8.98E-07 |
| 0.1410078826 | 0.0239652792  | 5.883840594 | 1.59E-08 TJP1     | 1.31E-06 |
| 0.4515490347 | 0.07504581451 | 6.016978264 | 7.96E-09 TNIP1    | 7.35E-07 |
| 2.800753974  | 0.2833076476  | 9.885910237 | 4.01E-19 TNS1     | 9.64E-16 |

|              |               |             |                   |          |
|--------------|---------------|-------------|-------------------|----------|
| 0.4810599053 | 0.05361587853 | 8.972340256 | 1.77E-16 TNS3     | 1.14E-13 |
| 0.1333944881 | 0.02294871624 | 5.812721144 | 2.30E-08 TRAPPC6B | 1.80E-06 |
| 0.4807820587 | 0.08035379365 | 5.983314998 | 9.50E-09 TRIP12   | 8.46E-07 |
| 0.6998679709 | 0.07856814129 | 8.907783223 | 2.70E-16 TSPAN15  | 1.65E-13 |
| 0.1515666799 | 0.02232531784 | 6.789004349 | 1.17E-10 TUFT1    | 1.73E-08 |
| 0.5833049573 | 0.08044915873 | 7.250603568 | 8.12E-12 UGP2     | 1.59E-09 |
| 0.2099062035 | 0.03364299452 | 6.239224734 | 2.44E-09 USP24    | 2.60E-07 |
| 0.2627325856 | 0.04291461799 | 6.122216574 | 4.56E-09 UTP23    | 4.48E-07 |
| 0.8158445338 | 0.1332908441  | 6.120784508 | 4.60E-09 UTRN     | 4.51E-07 |
| 0.1818444879 | 0.01674265982 | 10.8611469  | 4.87E-22 VIPR1    | 2.73E-18 |
| 0.232482598  | 0.03008441151 | 7.727676438 | 4.66E-13 WDR11    | 1.21E-10 |
| 0.2424531722 | 0.03632575786 | 6.674414699 | 2.23E-10 WWC2     | 3.08E-08 |
| 0.2271408945 | 0.03553445098 | 6.392131811 | 1.07E-09 ZFYVE16  | 1.24E-07 |
| 0.173627658  | 0.0288469751  | 6.018920786 | 7.88E-09 ZMYM2    | 7.29E-07 |
| 0.1048933008 | 0.01803854212 | 5.814954449 | 2.27E-08 ZRANB1   | 1.79E-06 |
