# Supplementary material
Source: PubMed Central journal article supplement (PMC11533588)
Supplement: NIHMS1924044-supplement-st8.pdf [file NIHMS1924044-supplement-st8.pdf]

Supplemental Table 8: List of KEGG pathways enriched among PAC-coexpressed genes. Term, which pathway; Overlap, number of genes that overlap and total genes; P-value, enrichment p-value; Adjusted P-value, Q-value; Odds Ratio, enrichment; Combined Score, approximation of overall association (-log10(P) \* log(Odds)). Genes, genes in the pathway which are co-expressed with COBLL1.

| Term                                                     | Overlap | P-value        | Adjusted P-value | Old P-value | Old Adjusted P-value | Odds Ratio  | Combined Score | Genes                                                 |
|----------------------------------------------------------|---------|----------------|------------------|-------------|----------------------|-------------|----------------|-------------------------------------------------------|
| Regulation of lipolysis in adipocytes                    | 6/55    | 5.97E-06       | 0.001051127782   | 0           | 0                    | 15.23758183 | 183.2833576    | PIK3CA;PTGER3;NPY1R;IRS2;PLIN1;GNAI1                  |
| Regulation of actin cytoskeleton                         | 8/214   | 4.11E-04       | 0.03620471319    | 0           | 0                    | 4.855358358 | 37.85190174    | ITGAM;PIK3CA;ROCK2;ITGA1;ARHGEF7;CRK;FGFR2;ARHGEF6    |
| Rap1 signaling pathway                                   | 6/206   | 0.007341186255 | 0.3184968891     | 0           | 0                    | 3.704716981 | 18.20592333    | ITGAM;PIK3CA;ANGPT1;CRK;FGFR2;GNAI1                   |
| Phagosome                                                | 5/152   | 0.00861165175  | 0.3184968891     | 0           | 0                    | 4.18537415  | 19.89994374    | STX12;DYNC1LI2;ITGAM;STX7;THBS4                       |
| Wnt signaling pathway                                    | 5/158   | 0.01007575097  | 0.3184968891     | 0           | 0                    | 4.02001634  | 18.48252214    | TCF7L2;ROCK2;CTNBP1;SIAH1;LRP5                        |
| Leukocyte transendothelial migration                     | 4/112   | 0.01393340241  | 0.3184968891     | 0           | 0                    | 4.538072234 | 19.39329862    | ITGAM;PIK3CA;ROCK2;GNAI1                              |
| Sphingolipid signaling pathway                           | 4/119   | 0.01704819155  | 0.3184968891     | 0           | 0                    | 4.260329463 | 17.34683097    | FCER1G;PIK3CA;ROCK2;GNAI1                             |
| Acute myeloid leukemia                                   | 3/66    | 0.01726623386  | 0.3184968891     | 0           | 0                    | 5.811875367 | 23.59041656    | TCF7L2;ITGAM;PIK3CA                                   |
| AMPK signaling pathway                                   | 4/120   | 0.01752578004  | 0.3184968891     | 0           | 0                    | 4.223388306 | 17.07973005    | PIK3CA;CAB39L;LEP;IRS2                                |
| Platelet activation                                      | 4/124   | 0.0195193035   | 0.3184968891     | 0           | 0                    | 4.081780538 | 16.06732245    | FCER1G;PIK3CA;ROCK2;GNAI1                             |
| Adherens junction                                        | 3/72    | 0.02171569698  | 0.3184968891     | 0           | 0                    | 5.304884595 | 20.31622219    | TJP1;TCF7L2;PTPRM                                     |
| Arrhythmogenic right ventricular cardiomyopathy (ARVC)   | 3/72    | 0.02171569698  | 0.3184968891     | 0           | 0                    | 5.304884595 | 20.31622219    | TCF7L2;ITGA1;DSG2                                     |
| Focal adhesion                                           | 5/199   | 0.02480488911  | 0.3358200372     | 0           | 0                    | 3.163820876 | 11.69574252    | PIK3CA;ROCK2;ITGA1;CRK;THBS4                          |
| Signaling pathways regulating pluripotency of stem cells | 4/139   | 0.02821148919  | 0.3431865307     | 0           | 0                    | 3.625488843 | 12.93583833    | PIK3CA;ID4;ACVR1B;FGFR2                               |
| cAMP signaling pathway                                   | 5/212   | 0.03139843544  | 0.3431865307     | 0           | 0                    | 2.963164251 | 10.25550322    | PIK3CA;ROCK2;PTGER3;NPY1R;GNAI1                       |
| Pathways in cancer                                       | 9/530   | 0.03201528827  | 0.3431865307     | 0           | 0                    | 2.138712535 | 7.360468442    | TCF7L2;PIK3CA;ROCK2;DAPK2;PTGER3;LRP5;CRK;FGFR2;GNAI1 |
| Salmonella infection                                     | 3/86    | 0.03430245953  | 0.3431865307     | 0           | 0                    | 4.406961178 | 14.86264501    | TJP1;DYNC1LI2;ROCK2                                   |
| Gastric cancer                                           | 4/149   | 0.0351031392   | 0.3431865307     | 0           | 0                    | 3.373741701 | 11.30022879    | TCF7L2;PIK3CA;LRP5;FGFR2                              |
| TGF-beta signaling pathway                               | 3/90    | 0.03846010217  | 0.3431865307     | 0           | 0                    | 4.203490847 | 13.69553595    | ZFYVE16;ID4;ACVR1B                                    |
| Human cytomegalovirus infection                          | 5/225   | 0.03899846939  | 0.3431865307     | 0           | 0                    | 2.786221591 | 9.039151696    | PIK3CA;ROCK2;PTGER3;CRK;GNAI1                         |
| Hippo signaling pathway                                  | 4/160   | 0.04371676499  | 0.3544716249     | 0           | 0                    | 3.134097786 | 9.890800074    | TCF7L2;DLG1;LATS2;TEAD1                               |
| Hematopoietic cell lineage                               | 3/97    | 0.04632299643  | 0.3544716249     | 0           | 0                    | 3.889085894 | 11.94772595    | ITGAM;ITGA1;CD37                                      |
| Prostate cancer                                          | 3/97    | 0.04632299643  | 0.3544716249     | 0           | 0                    | 3.889085894 | 11.94772595    | TCF7L2;PIK3CA;FGFR2                                   |
| Hepatocellular carcinoma                                 | 4/168   | 0.05066285914  | 0.3695208091     | 0           | 0                    | 2.98000303  | 8.888044387    | TCF7L2;PBRM1;PIK3CA;LRP5                              |
| Tight junction                                           | 4/170   | 0.0524887513   | 0.3695208091     | 0           | 0                    | 2.943800045 | 8.675839123    | TJP1;EPB41L4B;DLG1;ROCK2                              |
| Type II diabetes mellitus                                | 2/46    | 0.05528205448  | 0.3742169842     | 0           | 0                    | 5.518962632 | 15.97909079    | PIK3CA;IRS2                                           |
| Chemokine signaling pathway                              | 4/190   | 0.07268413666  | 0.4737928908     | 0           | 0                    | 2.62459093  | 6.880711887    | PIK3CA;ROCK2;CRK;GNAI1                                |
| Legionellosis                                            | 2/55    | 0.07564068724  | 0.4754557483     | 0           | 0                    | 4.579696724 | 11.82368216    | BCL2L13;ITGAM                                         |
| Endometrial cancer                                       | 2/58    | 0.08288187427  | 0.481848918      | 0           | 0                    | 4.33369851  | 10.79237792    | TCF7L2;PIK3CA                                         |
| Autophagy                                                | 3/128   | 0.08953068266  | 0.481848918      | 0           | 0                    | 2.92        | 7.046467757    | PIK3CA;DAPK2;IRS2                                     |
| MAPK signaling pathway                                   | 5/295   | 0.09781411319  | 0.481848918      | 0           | 0                    | 2.106142241 | 4.896120237    | PPM1A;ANGPT1;CRK;FGFR2;MAP4K3                         |
| Central carbon metabolism in cancer                      | 2/65    | 0.1005407368   | 0.481848918      | 0           | 0                    | 3.850813127 | 8.846058235    | PIK3CA;FGFR2                                          |
| Shigellosis                                              | 2/65    | 0.1005407368   | 0.481848918      | 0           | 0                    | 3.850813127 | 8.846058235    | ROCK2;CRK                                             |
| Ubiquitin mediated proteolysis                           | 3/137   | 0.1043802331   | 0.481848918      | 0           | 0                    | 2.722636816 | 6.152383143    | SIAH1;TRIP12;RHOBTB1                                  |
| Insulin signaling pathway                                | 3/137   | 0.1043802331   | 0.481848918      | 0           | 0                    | 2.722636816 | 6.152383143    | PIK3CA;IRS2;CRK                                       |
| Fc epsilon RI signaling pathway                          | 2/68    | 0.1084025396   | 0.481848918      | 0           | 0                    | 3.675218442 | 8.165981683    | FCER1G;PIK3CA                                         |
| Adipocytokine signaling pathway                          | 2/69    | 0.1110587352   | 0.481848918      | 0           | 0                    | 3.620181302 | 7.956058228    | LEP;IRS2                                              |
| Renal cell carcinoma                                     | 2/69    | 0.1110587352   | 0.481848918      | 0           | 0                    | 3.620181302 | 7.956058228    | PIK3CA;CRK                                            |
| Breast cancer                                            | 3/147   | 0.1219291616   | 0.481848918      | 0           | 0                    | 2.532278807 | 5.328712393    | TCF7L2;PIK3CA;LRP5                                    |
| Bacterial invasion of epithelial cells                   | 2/74    | 0.1245859547   | 0.481848918      | 0           | 0                    | 3.367927744 | 7.014583174    | PIK3CA;CRK                                            |
| Inositol phosphate metabolism                            | 2/74    | 0.1245859547   | 0.481848918      | 0           | 0                    | 3.367927744 | 7.014583174    | PIK3CA;ITPK1                                          |
| Non-alcoholic fatty liver disease (NAFLD)                | 3/149   | 0.125561971    | 0.481848918      | 0           | 0                    | 2.497336377 | 5.181862725    | PIK3CA;LEP;IRS2                                       |
| Pancreatic cancer                                        | 2/75    | 0.1273375342   | 0.481848918      | 0           | 0                    | 3.21623666  | 6.84558061     | PIK3CA;ARHGEF6                                        |
| Chronic myeloid leukemia                                 | 2/76    | 0.1301034834   | 0.481848918      | 0           | 0                    | 3.27657105  | 6.682321303    | PIK3CA;CRK                                            |
| Pertussis                                                | 2/76    | 0.1301034834   | 0.481848918      | 0           | 0                    | 3.27657105  | 6.682321303    | ITGAM;GNAI1                                           |
| mTOR signaling pathway                                   | 3/152   | 0.1310837519   | 0.481848918      | 0           | 0                    | 2.446681581 | 4.971458382    | PIK3CA;CAB39L;LRP5                                    |
| Nitrogen metabolism                                      | 1/17    | 0.1314133413   | 0.481848918      | 0           | 0                    | 7.552972561 | 15.32806027    | CA4                                                   |
| Phenylalanine metabolism                                 | 1/17    | 0.1314133413   | 0.481848918      | 0           | 0                    | 7.552972561 | 15.32806027    | GLYAT                                                 |
| Human papillomavirus infection                           | 5/330   | 0.1380428311   | 0.4958273117     | 0           | 0                    | 1.875961538 | 3.714762664    | TCF7L2;DLG1;PIK3CA;ITGA1;THBS4                        |
| ECM-receptor interaction                                 | 2/82    | 0.1469778053   | 0.5091430656     | 0           | 0                    | 3.029907975 | 5.80976882     | ITGA1;THBS4                                           |

|                                                     |       |              |              |   |   |             |             |                                 |
|-----------------------------------------------------|-------|--------------|--------------|---|---|-------------|-------------|---------------------------------|
| Neuroactive ligand-receptor interaction             | 5/338 | 0.1481362497 | 0.5091430656 | 0 | 0 | 1.830142643 | 3.494882159 | VIPR1;LEP;PTGER3;NPY1R;SCTR     |
| ErbB signaling pathway                              | 2/85  | 0.1555762012 | 0.5091430656 | 0 | 0 | 2.919949738 | 5.432915793 | PIK3CA;CRK                      |
| cGMP-PKG signaling pathway                          | 3/166 | 0.1579159012 | 0.5091430656 | 0 | 0 | 2.234946603 | 4.125024538 | ROCK2;IRS2;GNAI1                |
| Colorectal cancer                                   | 2/86  | 0.1584636726 | 0.5091430656 | 0 | 0 | 2.885042361 | 5.314911319 | TCF7L2;PIK3CA                   |
| Gap junction                                        | 2/88  | 0.1642684293 | 0.5091430656 | 0 | 0 | 2.817663005 | 5.089413453 | TJP1;GNAI1                      |
| Other types of O-glycan biosynthesis                | 1/22  | 0.1666891242 | 0.5091430656 | 0 | 0 | 5.753193961 | 10.30756459 | EOGT                            |
| PI3K-Akt signaling pathway                          | 5/354 | 0.1692266814 | 0.5091430656 | 0 | 0 | 1.74480659  | 3.099677091 | PIK3CA;ANGPT1;ITGA1;FGFR2;THBS4 |
| Fc gamma R-mediated phagocytosis                    | 2/91  | 0.1730447867 | 0.5091430656 | 0 | 0 | 2.722272007 | 4.775422718 | PIK3CA;CRK                      |
| Proximal tubule bicarbonate reclamation             | 1/23  | 0.1735714996 | 0.5091430656 | 0 | 0 | 5.491407982 | 9.616365099 | CA4                             |
| Renin-angiotensin system                            | 1/23  | 0.1735714996 | 0.5091430656 | 0 | 0 | 5.491407982 | 9.616365099 | LNPEP                           |
| Vitamin digestion and absorption                    | 1/24  | 0.1803973747 | 0.5098735651 | 0 | 0 | 5.252386002 | 8.995200678 | SLC19A3                         |
| Amoebiasis                                          | 2/96  | 0.1878339566 | 0.5098735651 | 0 | 0 | 2.576817648 | 4.308946524 | ITGAM;PIK3CA                    |
| Axon guidance                                       | 3/181 | 0.1883403869 | 0.5098735651 | 0 | 0 | 2.045047857 | 3.414216364 | PIK3CA;ROCK2;GNAI1              |
| Choline metabolism in cancer                        | 2/99  | 0.1967903293 | 0.5098735651 | 0 | 0 | 2.496742774 | 4.058746088 | PIK3CA;SLC44A2                  |
| Phosphatidylinositol signaling system               | 2/99  | 0.1967903293 | 0.5098735651 | 0 | 0 | 2.496742774 | 4.058746088 | PIK3CA;ITPK1                    |
| Progesterone-mediated oocyte maturation             | 2/99  | 0.1967903293 | 0.5098735651 | 0 | 0 | 2.496742774 | 4.058746088 | PIK3CA;GNAI1                    |
| HIF-1 signaling pathway                             | 2/100 | 0.1997877373 | 0.5098735651 | 0 | 0 | 2.471140603 | 3.979771422 | PIK3CA;ANGPT1                   |
| T cell receptor signaling pathway                   | 2/101 | 0.2027906225 | 0.5098735651 | 0 | 0 | 2.446055649 | 3.902880526 | DLG1;PIK3CA                     |
| Melanogenesis                                       | 2/101 | 0.2027906225 | 0.5098735651 | 0 | 0 | 2.446055649 | 3.902880526 | TCF7L2;GNAI1                    |
| Ribosome biogenesis in eukaryotes                   | 2/101 | 0.2027906225 | 0.5098735651 | 0 | 0 | 2.446055649 | 3.902880526 | RBM28;SBDS                      |
| Longevity regulating pathway                        | 2/102 | 0.2057986929 | 0.5101488726 | 0 | 0 | 2.421472393 | 3.828001115 | PIK3CA;IRS2                     |
| Chagas disease (American trypanosomiasis)           | 2/103 | 0.2088116608 | 0.5104285041 | 0 | 0 | 2.397375934 | 3.755064053 | PIK3CA;GNAI1                    |
| C-type lectin receptor signaling pathway            | 2/104 | 0.2118292428 | 0.5107115999 | 0 | 0 | 2.373751955 | 3.684003185 | FCER1G;PIK3CA                   |
| Parathyroid hormone synthesis, secretion and action | 2/106 | 0.2178771372 | 0.5180222835 | 0 | 0 | 2.327866918 | 3.547259399 | LRP5;GNAI1                      |
| Insulin resistance                                  | 2/108 | 0.2239401942 | 0.5180222835 | 0 | 0 | 2.283713393 | 3.417294489 | PIK3CA;IRS2                     |
| Asthma                                              | 1/31  | 0.226634749  | 0.5180222835 | 0 | 0 | 4.025406504 | 5.975376181 | FCER1G                          |
| Galactose metabolism                                | 1/31  | 0.226634749  | 0.5180222835 | 0 | 0 | 4.025406504 | 5.975376181 | UGP2                            |
| Cholinergic synapse                                 | 2/112 | 0.2361033976 | 0.532746128  | 0 | 0 | 2.20022309  | 3.175990004 | PIK3CA;GNAI1                    |
| Pentose and glucuronate interconversions            | 1/34  | 0.2456482042 | 0.5404260492 | 0 | 0 | 3.658906135 | 5.136573052 | UGP2                            |
| SNARE interactions in vesicular transport           | 1/34  | 0.2456482042 | 0.5404260492 | 0 | 0 | 3.658906135 | 5.136573052 | STX7                            |
| Alanine, aspartate and glutamate metabolism         | 1/35  | 0.2518821951 | 0.5406821715 | 0 | 0 | 3.551111908 | 4.896251013 | RIMKLB                          |
| Human immunodeficiency virus 1 infection            | 3/212 | 0.2551119415 | 0.5406821715 | 0 | 0 | 1.738968634 | 2.375523048 | PIK3CA;CRK;GNAI1                |
| Neurotrophin signaling pathway                      | 2/119 | 0.2574666873 | 0.5406821715 | 0 | 0 | 2.067851712 | 2.805795483 | PIK3CA;CRK                      |
| Starch and sucrose metabolism                       | 1/36  | 0.2580649778 | 0.5406821715 | 0 | 0 | 3.449477352 | 4.672468415 | UGP2                            |
| Aldosterone-regulated sodium reabsorption           | 1/37  | 0.2641969702 | 0.5406821715 | 0 | 0 | 3.35348916  | 4.463696472 | PIK3CA                          |
| Thyroid cancer                                      | 1/37  | 0.2641969702 | 0.5406821715 | 0 | 0 | 3.35348916  | 4.463696472 | TCF7L2                          |
| Ferroptosis                                         | 1/40  | 0.2822923363 | 0.566410991  | 0 | 0 | 3.095059412 | 3.914668568 | GCLC                            |
| Bladder cancer                                      | 1/41  | 0.2882252814 | 0.566410991  | 0 | 0 | 3.017530488 | 3.753846786 | DAPK2                           |
| Relaxin signaling pathway                           | 2/130 | 0.2910737439 | 0.566410991  | 0 | 0 | 1.889091258 | 2.331476057 | PIK3CA;GNAI1                    |
| Natural killer cell mediated cytotoxicity           | 2/131 | 0.2941233251 | 0.566410991  | 0 | 0 | 1.874352024 | 2.293749772 | FCER1G;PIK3CA                   |
| Vascular smooth muscle contraction                  | 2/132 | 0.2971711543 | 0.566410991  | 0 | 0 | 1.859839547 | 2.256816773 | PPP1R14A;ROCK2                  |
| FoxO signaling pathway                              | 2/132 | 0.2971711543 | 0.566410991  | 0 | 0 | 1.859839547 | 2.256816773 | PIK3CA;IRS2                     |
| Ras signaling pathway                               | 3/232 | 0.2998089497 | 0.566410991  | 0 | 0 | 1.585476306 | 1.909880362 | PIK3CA;ANGPT1;FGFR2             |
| Vasopressin-regulated water reabsorption            | 1/44  | 0.3057332054 | 0.566410991  | 0 | 0 | 2.806579694 | 3.325916035 | DYNC1LI2                        |
| Carbohydrate digestion and absorption               | 1/44  | 0.3057332054 | 0.566410991  | 0 | 0 | 2.806579694 | 3.325916035 | PIK3CA                          |
| Apelin signaling pathway                            | 2/137 | 0.3123779022 | 0.566788771  | 0 | 0 | 1.790502159 | 2.083323745 | PLIN1;GNAI1                     |
| Estrogen signaling pathway                          | 2/137 | 0.3123779022 | 0.566788771  | 0 | 0 | 1.790502159 | 2.083323745 | PIK3CA;GNAI1                    |
| Cysteine and methionine metabolism                  | 1/47  | 0.3228130225 | 0.5744963885 | 0 | 0 | 2.623144221 | 2.965941956 | GCLC                            |
| Endocytosis                                         | 3/244 | 0.3268590527 | 0.5744963885 | 0 | 0 | 1.505609344 | 1.683611864 | ZFYVE16;FGFR2;RNF41             |
| Amino sugar and nucleotide sugar metabolism         | 1/48  | 0.3284129659 | 0.5744963885 | 0 | 0 | 2.567202906 | 2.858537872 | UGP2                            |
| Cocaine addiction                                   | 1/49  | 0.3339668792 | 0.5744963885 | 0 | 0 | 2.51359248  | 2.756690693 | GNAI1                           |
| Malaria                                             | 1/49  | 0.3339668792 | 0.5744963885 | 0 | 0 | 2.51359248  | 2.756690693 | THBS4                           |
| Cell adhesion molecules (CAMs)                      | 2/145 | 0.3365566207 | 0.5744963885 | 0 | 0 | 1.689647776 | 1.840007639 | ITGAM;PTPRM                     |
| Vibrio cholerae infection                           | 1/50  | 0.3394751386 | 0.5744963885 | 0 | 0 | 2.462170234 | 2.68001685  | TJP1                            |

|                                                            |       |               |              |   |   |              |              |                 |
|------------------------------------------------------------|-------|---------------|--------------|---|---|--------------|--------------|-----------------|
| Phospholipase D signaling pathway                          | 2/148 | 0.345562004   | 0.57922774   | 0 | 0 | 1.654676864  | 1.758231821  | FCER1G;PIK3CA   |
| Glycosaminoglycan biosynthesis                             | 1/53  | 0.3557297082  | 0.5862640824 | 0 | 0 | 2.319770169  | 2.397677523  | CHST3           |
| Oxytocin signaling pathway                                 | 2/153 | 0.3604815199  | 0.5862640824 | 0 | 0 | 1.59947995   | 1.631972723  | ROCK2;GNAI1     |
| Fanconi anemia pathway                                     | 1/54  | 0.3610590517  | 0.5862640824 | 0 | 0 | 2.275885872  | 2.318476245  | POLI            |
| Pathogenic Escherichia coli infection                      | 1/55  | 0.3663445763  | 0.5862640824 | 0 | 0 | 2.23362692   | 2.242965542  | ROCK2           |
| Cushing syndrome                                           | 2/155 | 0.3664150515  | 0.5862640824 | 0 | 0 | 1.578411324  | 1.584706924  | TCF7L2;GNAI1    |
| Glutathione metabolism                                     | 1/56  | 0.3715866401  | 0.5891824203 | 0 | 0 | 2.192904656  | 2.170916895  | GCLC            |
| Cellular senescence                                        | 2/160 | 0.3811549128  | 0.597559529  | 0 | 0 | 1.528073309  | 1.47390218   | PIK3CA;HIPK3    |
| JAK-STAT signaling pathway                                 | 2/162 | 0.3870109506  | 0.597559529  | 0 | 0 | 1.508819018  | 1.43232535   | PIK3CA;LEP      |
| VEGF signaling pathway                                     | 1/59  | 0.387055604   | 0.597559529  | 0 | 0 | 2.079163162  | 1.973514471  | PIK3CA          |
| Long-term depression                                       | 1/60  | 0.3921273477  | 0.6001253321 | 0 | 0 | 2.04381976   | 1.913359935  | GNAI1           |
| Basal cell carcinoma                                       | 1/63  | 0.4070936593  | 0.6086236357 | 0 | 0 | 1.944630212  | 1.747662505  | TCF7L2          |
| Mitophagy                                                  | 1/65  | 0.41168671431 | 0.6086236357 | 0 | 0 | 1.88366997   | 1.648188073  | BCL2L13         |
| Non-small cell lung cancer                                 | 1/66  | 0.421693666   | 0.6086236357 | 0 | 0 | 1.854596623  | 1.60139993   | PIK3CA          |
| Retinol metabolism                                         | 1/67  | 0.4264804804  | 0.6086236357 | 0 | 0 | 1.826404287  | 1.556441058  | RDH10           |
| Staphylococcus aureus infection                            | 1/68  | 0.4312279109  | 0.6086236357 | 0 | 0 | 1.799053513  | 1.513217252  | ITGAM           |
| Epithelial cell signaling in Helicobacter pylori infection | 1/68  | 0.4312279109  | 0.6086236357 | 0 | 0 | 1.799053513  | 1.513217252  | TJP1            |
| Tuberculosis                                               | 2/179 | 0.435741226   | 0.6086236357 | 0 | 0 | 1.362725729  | 1.132025434  | ITGAM;FCER1G    |
| Renin secretion                                            | 1/69  | 0.4359362798  | 0.6086236357 | 0 | 0 | 1.772507174  | 1.471640377  | GNAI1           |
| Prolactin signaling pathway                                | 1/70  | 0.4406059062  | 0.6086236357 | 0 | 0 | 1.746730293  | 1.431627903  | PIK3CA          |
| B cell receptor signaling pathway                          | 1/71  | 0.4452371073  | 0.6086236357 | 0 | 0 | 1.721689895  | 1.393102475  | PIK3CA          |
| MicroRNAs in cancer                                        | 3/299 | 0.449022173   | 0.6086236357 | 0 | 0 | 1.22240991   | 0.9787628455 | PIK3CA;IRS2;CRK |
| Bile secretion                                             | 1/72  | 0.4498301972  | 0.6086236357 | 0 | 0 | 1.697354861  | 1.35599152   | SCTR            |
| p53 signaling pathway                                      | 1/72  | 0.4498301972  | 0.6086236357 | 0 | 0 | 1.697354861  | 1.35599152   | SIAH1           |
| Melanoma                                                   | 1/72  | 0.4498301972  | 0.6086236357 | 0 | 0 | 1.697354861  | 1.35599152   | PIK3CA          |
| Transcriptional misregulation in cancer                    | 2/186 | 0.4552026471  | 0.6086236357 | 0 | 0 | 1.310416111  | 1.031313965  | ITGAM;SIX1      |
| Leishmaniasis                                              | 1/74  | 0.4589032878  | 0.6086236357 | 0 | 0 | 1.650684932  | 1.285744562  | ITGAM           |
| PPAR signaling pathway                                     | 1/74  | 0.4589032878  | 0.6086236357 | 0 | 0 | 1.650684932  | 1.285744562  | PLIN1           |
| Gastric acid secretion                                     | 1/75  | 0.4633839044  | 0.6086236357 | 0 | 0 | 1.628295979  | 1.252484292  | GNAI1           |
| Glioma                                                     | 1/75  | 0.4633839044  | 0.6086236357 | 0 | 0 | 1.628295979  | 1.252484292  | PIK3CA          |
| Complement and coagulation cascades                        | 1/79  | 0.4809405821  | 0.6270040181 | 0 | 0 | 1.544480926  | 1.130577871  | ITGAM           |
| Viral carcinogenesis                                       | 2/201 | 0.4955797359  | 0.6366571789 | 0 | 0 | 1.210716157  | 0.8499554539 | DLG1;PIK3CA     |
| Proteoglycans in cancer                                    | 2/201 | 0.4955797359  | 0.6366571789 | 0 | 0 | 1.210716157  | 0.8499554539 | PIK3CA;ROCK2    |
| Hypertrophic cardiomyopathy (HCM)                          | 1/85  | 0.5062106872  | 0.6456020358 | 0 | 0 | 1.433725319  | 0.9760835216 | ITGA1           |
| GABAergic synapse                                          | 1/89  | 0.5223741921  | 0.6572207146 | 0 | 0 | 1.368278825  | 0.888520732  | GNAI1           |
| Dilated cardiomyopathy (DCM)                               | 1/91  | 0.530257622   | 0.6572207146 | 0 | 0 | 1.337737127  | 0.848650148  | ITGA1           |
| Morphine addiction                                         | 1/91  | 0.530257622   | 0.6572207146 | 0 | 0 | 1.337737127  | 0.848650148  | GNAI1           |
| Rheumatoid arthritis                                       | 1/91  | 0.530257622   | 0.6572207146 | 0 | 0 | 1.337737127  | 0.848650148  | ANGPT1          |
| Small cell lung cancer                                     | 1/93  | 0.5380117076  | 0.6617952599 | 0 | 0 | 1.30852333   | 0.811120838  | PIK3CA          |
| Human T-cell leukemia virus 1 infection                    | 2/219 | 0.541468849   | 0.6617952599 | 0 | 0 | 1.109270306  | 0.6805037679 | DLG1;PIK3CA     |
| Circadian entrainment                                      | 1/97  | 0.5531402491  | 0.6663933689 | 0 | 0 | 1.253747459  | 0.7423986527 | GNAI1           |
| Glycerophospholipid metabolism                             | 1/97  | 0.5531402491  | 0.6663933689 | 0 | 0 | 1.253747459  | 0.7423986527 | LPGAT1          |
| Pancreatic secretion                                       | 1/98  | 0.556844799   | 0.6663933689 | 0 | 0 | 1.240759366  | 0.7264257922 | SCTR            |
| AGE-RAGE signaling pathway in diabetic complications       | 1/100 | 0.564162568   | 0.6663933689 | 0 | 0 | 1.215570338  | 0.6958080543 | PIK3CA          |
| Inflammatory mediator regulation of TRP channels           | 1/100 | 0.564162568   | 0.6663933689 | 0 | 0 | 1.215570338  | 0.6958080543 | PIK3CA          |
| Toll-like receptor signaling pathway                       | 1/104 | 0.5784397132  | 0.6787025968 | 0 | 0 | 1.168126924  | 0.6394571505 | PIK3CA          |
| Drug metabolism                                            | 1/108 | 0.5922519084  | 0.6903068602 | 0 | 0 | 1.124230682  | 0.5888981284 | FMO3            |
| TNF signaling pathway                                      | 1/110 | 0.5989883727  | 0.6935654841 | 0 | 0 | 1.103490714  | 0.5655534381 | PIK3CA          |
| Toxoplasmosis                                              | 1/113 | 0.6088862012  | 0.6950651202 | 0 | 0 | 1.073769599  | 0.5327227511 | GNAI1           |
| Serotonergic synapse                                       | 1/113 | 0.6088862012  | 0.6950651202 | 0 | 0 | 1.073769599  | 0.5327227511 | GNAI1           |
| Glutamatergic synapse                                      | 1/114 | 0.6121312138  | 0.6950651202 | 0 | 0 | 1.064213253  | 0.5223250357 | GNAI1           |
| Thyroid hormone signaling pathway                          | 1/116 | 0.6185411733  | 0.6978413237 | 0 | 0 | 1.045599152  | 0.5022969656 | PIK3CA          |
| Osteoclast differentiation                                 | 1/127 | 0.6519591547  | 0.7308586702 | 0 | 0 | 0.9537843593 | 0.4080035451 | PIK3CA          |
| Dopaminergic synapse                                       | 1/131 | 0.6633755491  | 0.7389499788 | 0 | 0 | 0.924249531  | 0.3793249563 | GNAI1           |

|                                                 |       |              |              |   |   |              |                |            |
|-------------------------------------------------|-------|--------------|--------------|---|---|--------------|----------------|------------|
| Measles                                         | 1/138 | 0.6824657016 | 0.7518531149 | 0 | 0 | 0.8767135482 | 0.3349422805   | PIK3CA     |
| Fluid shear stress and atherosclerosis          | 1/139 | 0.6851035493 | 0.7518531149 | 0 | 0 | 0.8703163662 | 0.3291408433   | PIK3CA     |
| Parkinson disease                               | 1/142 | 0.6928871156 | 0.7518531149 | 0 | 0 | 0.8516692614 | 0.3124673899   | GNAI1      |
| Apoptosis                                       | 1/143 | 0.6954389031 | 0.7518531149 | 0 | 0 | 0.8456286499 | 0.3071425726   | PIK3CA     |
| Adrenergic signaling in cardiomyocytes          | 1/145 | 0.7004794249 | 0.7518531149 | 0 | 0 | 0.8337991192 | 0.2968243866   | GNAI1      |
| Cytokine-cytokine receptor interaction          | 2/294 | 0.7005904025 | 0.7518531149 | 0 | 0 | 0.8212034625 | 0.2922103615   | LEP;ACVR1B |
| Retrograde endocannabinoid signaling            | 1/148 | 0.7078851489 | 0.7550774922 | 0 | 0 | 0.8166583707 | 0.2821337582   | GNAI1      |
| Hepatitis C                                     | 1/155 | 0.7244649596 | 0.7681074271 | 0 | 0 | 0.7792603738 | 0.2511726712   | PIK3CA     |
| Hepatitis B                                     | 1/163 | 0.7422707064 | 0.7774622274 | 0 | 0 | 0.7404772659 | 0.220692784    | PIK3CA     |
| Protein processing in endoplasmic reticulum     | 1/165 | 0.7465404342 | 0.7774622274 | 0 | 0 | 0.7313726948 | 0.2137842601   | SEL1L      |
| RNA transport                                   | 1/165 | 0.7465404342 | 0.7774622274 | 0 | 0 | 0.7313726948 | 0.2137842601   | PAIP1      |
| Influenza A                                     | 1/171 | 0.7589323174 | 0.7857181639 | 0 | 0 | 0.7053443329 | 0.1945640704   | PIK3CA     |
| Alcoholism                                      | 1/180 | 0.7763998636 | 0.799101614  | 0 | 0 | 0.6695735114 | 0.1694607553   | GNAI1      |
| Kaposi sarcoma-associated herpesvirus infection | 1/186 | 0.7873399815 | 0.8045815851 | 0 | 0 | 0.647659855  | 0.1548523153   | PIK3CA     |
| Calcium signaling pathway                       | 1/188 | 0.7908671263 | 0.8045815851 | 0 | 0 | 0.6406677971 | 0.1503168788   | PTGER3     |
| Epstein-Barr virus infection                    | 1/201 | 0.8124179162 | 0.8217560532 | 0 | 0 | 0.5986280488 | 0.124359228    | PIK3CA     |
| Thermogenesis                                   | 1/231 | 0.8540923279 | 0.8589728554 | 0 | 0 | 0.5197507953 | 0.08197300541  | PLIN1      |
| Herpes simplex virus 1 infection                | 1/492 | 0.983865307  | 0.983865307  | 0 | 0 | 0.2402265163 | 0.003907590445 | PIK3CA     |
