# Supplementary material
Source: PubMed Central journal article supplement (PMC11533588)
Supplement: NIHMS1924044-supplement-st9.pdf [file NIHMS1924044-supplement-st9.pdf]

Supplemental Table 9: List of WikiPathway pathways enriched among PAC-coexpressed genes. Term, which pathway; Overlap, number of genes that overlap and total genes; P-value, enrichment p-value; Adjusted P-value, Q-value; Odds Ratio, enrichment; Combined Score, approximation of overall association (-log10(P) \* log(Odds)), Genes, genes in the pathway which are co-expressed with COBLL1.

| Term                                                                      | Overlap | P-value        | Adjusted P-value | Old P-value | Old Adjusted P-value | Odds Ratio   | Combined Score | Genes                                              |
|---------------------------------------------------------------------------|---------|----------------|------------------|-------------|----------------------|--------------|----------------|----------------------------------------------------|
| Regulation of Actin Cytoskeleton WP51                                     | 8/150   | 3.53E-05       | 0.005716497452   | 0           | 0                    | 7.066654705  | 72.44731104    | PIK3CA;ROCK2;ITGA1;FGF13;ARHGFE7;CRK;FGFR2;ARHGFE6 |
| Integrin-mediated Cell Adhesion WP185                                     | 6/101   | 1.91E-04       | 0.01547760381    | 0           | 0                    | 7.841112214  | 67.14195699    | ITGAM;ROCK2;ITGA1;ARHGFE7;CRK;TNS1                 |
| Hippo-Merlin Signaling Dysregulation WP4541                               | 6/120   | 4.84E-04       | 0.02615506119    | 0           | 0                    | 6.527970871  | 49.82602113    | PPP1R14A;ITGAM;LATS2;ITGA1;TEAD1;FGFR2             |
| Transcription factor regulation in adipogenesis WP3599                    | 3/22    | 7.57E-04       | 0.0265264414     | 0           | 0                    | 19.31384016  | 138.8017185    | LEP;NR1P1;IRS2                                     |
| Hippo-Yap signaling pathway WP4537                                        | 3/23    | 8.65E-04       | 0.0265264414     | 0           | 0                    | 18.34722222  | 129.4017394    | LATS2;TEAD1;MAP4K3                                 |
| Angiogenesis WP1539                                                       | 3/24    | 9.82E-04       | 0.0265264414     | 0           | 0                    | 17.47266314  | 121.0060571    | ANGPT1;PIK3CA;FGFR2                                |
| RAC1/PAK1/p38/MMP2 Pathway WP3303                                         | 4/68    | 0.002413216991 | 0.04922183061    | 0           | 0                    | 7.67507764   | 46.25611625    | PIK3CA;ANGPT1;TNIP1;CRK                            |
| Endothelin Pathways WP2197                                                | 3/33    | 0.00250832961  | 0.04922183061    | 0           | 0                    | 12.22530864  | 73.20683819    | NPY1R;ECE1;GNAI1                                   |
| Signaling of Hepatocyte Growth Factor Receptor WP313                      | 3/34    | 0.002734546145 | 0.04922183061    | 0           | 0                    | 11.83034648  | 69.82021816    | PIK3CA;ITGA1;CRK                                   |
| Microglia Pathogen Phagocytosis Pathway WP3937                            | 3/40    | 0.004354844189 | 0.06625395919    | 0           | 0                    | 9.908908909  | 53.86945081    | ITGAM;FCER1G;PIK3CA                                |
| Adipogenesis WP236                                                        | 5/130   | 0.004498725624 | 0.06625395919    | 0           | 0                    | 4.9275       | 26.6280184     | MBNL1;LEP;NR1P1;IRS2;PLIN1                         |
| MicroRNAs in cardiomyocyte hypertrophy WP1544                             | 4/84    | 0.005165305624 | 0.06973162592    | 0           | 0                    | 6.135093168  | 32.30611842    | PIK3CA;ROCK2;LRP5;FGFR2                            |
| Phytochemical activity on NRF2 transcriptional activation WP3             | 2/15    | 0.006619586347 | 0.08249022987    | 0           | 0                    | 18.70882492  | 93.8756898     | GCLC;PIK3CA                                        |
| Leptin Insulin Overlap WP3935                                             | 2/17    | 0.008481837734 | 0.09558953673    | 0           | 0                    | 16.21267894  | 77.3316922     | LEP;IRS2                                           |
| Pathways Regulating Hippo Signaling WP4540                                | 4/98    | 0.00885088303  | 0.09558953673    | 0           | 0                    | 5.21765561   | 24.66510012    | TCF7L2;LATS2;TEAD1;FGFR2                           |
| Transcription co-factors SKI and SKIL protein partners WP4533             | 2/18    | 0.009490728285 | 0.09609362389    | 0           | 0                    | 15.19861963  | 70.78665791    | LATS2;TEAD1                                        |
| Focal Adhesion-PI3K-Akt-mTOR-signaling pathway WP3932                     | 7/303   | 0.01305905678  | 0.1237434417     | 0           | 0                    | 2.924499658  | 12.68727902    | PIK3CA;ANGPT1;CAB39L;IRS2;FGF13;FGFR2;THBS4        |
| Wnt Signaling WP428                                                       | 4/115   | 0.01521981541  | 0.1237434417     | 0           | 0                    | 4.414750154  | 18.47642275    | TCF7L2;ROCK2;CTNBP1;LRP5                           |
| Endometrial cancer WP4155                                                 | 3/63    | 0.01525368398  | 0.1237434417     | 0           | 0                    | 6.103395062  | 25.53010014    | TCF7L2;PIK3CA;FGFR2                                |
| NRF2-ARE regulation WP4357                                                | 2/23    | 0.01527696811  | 0.1237434417     | 0           | 0                    | 11.57697926  | 48.40808453    | GCLC;PIK3CA                                        |
| GPCRs, Class B Secretin-like WP334                                        | 2/24    | 0.01657647246  | 0.1278756447     | 0           | 0                    | 11.0501952   | 45.30326885    | VIPR1;SCTR                                         |
| Vitamin D Receptor Pathway WP2877                                         | 5/182   | 0.01763264946  | 0.1298404188     | 0           | 0                    | 3.47069209   | 14.01466512    | LPGAT1;ITGAM;NR1P1;ID4;LRP5                        |
| Arrhythmogenic Right Ventricular Cardiomyopathy WP2118                    | 3/74    | 0.02332502782  | 0.1577122528     | 0           | 0                    | 5.154929577  | 19.37340243    | TCF7L2;ITGA1;DSG2                                  |
| Angiotensin Like Protein 8 Regulatory Pathway WP3915                      | 4/132   | 0.02391282651  | 0.1577122528     | 0           | 0                    | 3.82511646   | 14.28046139    | PIK3CA;IRS2;CRK;MAP4K3                             |
| Focal Adhesion WP306                                                      | 5/198   | 0.02433831062  | 0.1577122528     | 0           | 0                    | 3.180375648  | 11.81733325    | PIK3CA;ROCK2;ITGA1;CRK;THBS4                       |
| Ovarian Infertility Genes WP34                                            | 2/32    | 0.02853989391  | 0.1778254928     | 0           | 0                    | 8.100204499  | 28.8079916     | GJA4;NR1P1                                         |
| ncRNAs involved in Wnt signaling in hepatocellular carcinoma WP4336       | 3/86    | 0.03430245953  | 0.2023461694     | 0           | 0                    | 4.406961178  | 14.86264501    | TCF7L2;CTNBP1;LRP5                                 |
| Catalytic cycle of mammalian Flavin-containing MonoOxygenases (FMOs)      | 1/5     | 0.04057874345  | 0.2023461694     | 0           | 0                    | 30.23018293  | 96.87295099    | FMO3                                               |
| Sulindac Metabolic Pathway WP2542                                         | 1/5     | 0.04057874345  | 0.2023461694     | 0           | 0                    | 30.23018293  | 96.87295099    | MSRB3                                              |
| G13 Signaling Pathway WP524                                               | 2/39    | 0.04107582102  | 0.2023461694     | 0           | 0                    | 6.565412038  | 20.95899875    | PIK3CA;ROCK2                                       |
| Corticotropin-releasing hormone signaling pathway WP2355                  | 3/93    | 0.04173920331  | 0.2023461694     | 0           | 0                    | 4.062757202  | 12.90459446    | CRHBP;ECE1;GNAI1                                   |
| Sudden Infant Death Syndrome (SIDS) Susceptibility Pathways WP706         | 4/158   | 0.0420698762   | 0.2023461694     | 0           | 0                    | 3.175123014  | 10.06013381    | VIPR1;ECE1;FMO3;SPTBN1                             |
| LncRNA involvement in canonical Wnt signaling and colorectal cancer       | 3/94    | 0.0428625935   | 0.2023461694     | 0           | 0                    | 4.017908018  | 12.655429      | TCF7L2;CTNBP1;LRP5                                 |
| Epithelial to mesenchymal transition in colorectal cancer WP4239          | 4/159   | 0.04288883262  | 0.2023461694     | 0           | 0                    | 3.154478061  | 9.933905023    | TJP1;LATS2;PIK3CA;LRP5                             |
| Insulin Signaling WP481                                                   | 4/160   | 0.04371676499  | 0.2023461694     | 0           | 0                    | 3.134097786  | 9.809800074    | PIK3CA;IRS2;CRK;MAP4K3                             |
| Chemokine signaling pathway WP3929                                        | 4/164   | 0.0471181892   | 0.2120318514     | 0           | 0                    | 3.055124224  | 9.333698314    | PIK3CA;ROCK2;CRK;GNAI1                             |
| Nicotine Metabolism WP1600                                                | 1/6     | 0.04849592764  | 0.212333521      | 0           | 0                    | 24.18292683  | 73.18419779    | FMO3                                               |
| Wnt Signaling Pathway and Pluripotency WP399                              | 3/102   | 0.05238714227  | 0.2220928649     | 0           | 0                    | 3.691732136  | 10.88726544    | TCF7L2;LRP5;FBXW2                                  |
| MAPK Signaling Pathway WP382                                              | 5/246   | 0.05346680081  | 0.2220928649     | 0           | 0                    | 2.540715768  | 7.440979948    | PPM1A;FGF13;CRK;FGFR2;MAP4K3                       |
| Aryl Hydrocarbon Receptor WP2586                                          | 2/46    | 0.05528205448  | 0.2238923206     | 0           | 0                    | 5.1518962632 | 15.97909079    | GCLC;NR1P1                                         |
| Mechanoregulation and pathology of YAP/TAZ via Hippo and non-Hippo        | 2/47    | 0.0574344545   | 0.2269361373     | 0           | 0                    | 5.396046353  | 15.41710287    | TEAD1;MAP4K3                                       |
| PI3K-Akt Signaling Pathway WP4172                                         | 6/340   | 0.06310697469  | 0.2434126166     | 0           | 0                    | 2.20325387   | 6.087422954    | PIK3CA;ANGPT1;ITGA1;FGF13;FGFR2;THBS4              |
| Copper homeostasis WP3286                                                 | 2/52    | 0.06861665201  | 0.2452531022     | 0           | 0                    | 4.855214724  | 13.00818855    | PIK3CA;SLC31A2                                     |
| Wnt Signaling Pathway WP363                                               | 2/52    | 0.06861665201  | 0.2452531022     | 0           | 0                    | 4.855214724  | 13.00818855    | TCF7L2;LRP5                                        |
| ESC Pluripotency Pathways WP3931                                          | 3/116   | 0.07126575221  | 0.2452531022     | 0           | 0                    | 3.232055064  | 8.536954385    | LRP5;FGF13;FGFR2                                   |
| Thiamine metabolic pathways WP4297                                        | 1/9     | 0.07185996172  | 0.2452531022     | 0           | 0                    | 15.11204268  | 39.79055287    | SLC19A3                                            |
| IL-4 Signaling Pathway WP395                                              | 2/54    | 0.07327446892  | 0.2452531022     | 0           | 0                    | 4.668003775  | 12.20002878    | PIK3CA;IRS2                                        |
| Interferon type I signaling pathways WP585                                | 2/54    | 0.07327446892  | 0.2452531022     | 0           | 0                    | 4.668003775  | 12.20002878    | IRS2;CRK                                           |
| Spinal Cord Injury WP2431                                                 | 3/118   | 0.07418149388  | 0.2452531022     | 0           | 0                    | 3.175523349  | 8.260300163    | ROCK2;LEP;AIF1                                     |
| Gamma-Glutamyl Cycle for the biosynthesis and degradation of glutathione, | 1/10    | 0.07952054963  | 0.252594687      | 0           | 0                    | 13.43224932  | 34.00696028    | GCLC                                               |
| Leptin and adiponectin WP3934                                             | 1/10    | 0.07952054963  | 0.252594687      | 0           | 0                    | 13.43224932  | 34.00696028    | LEP                                                |
| Circadian rhythm related genes WP3594                                     | 4/201   | 0.08525211878  | 0.2608545216     | 0           | 0                    | 2.476652899  | 6.097871888    | ROCK2;LEP;NR1P1;ID4                                |
| MET in type 1 papillary renal cell carcinoma WP4205                       | 2/59    | 0.08534129411  | 0.2608545216     | 0           | 0                    | 4.25745345   | 10.47800522    | PIK3CA;CRK                                         |
| TYROBP Causal Network WP3945                                              | 2/61    | 0.09032547059  | 0.2709764118     | 0           | 0                    | 4.112717064  | 9.888352838    | ITGAM;CD37                                         |

|                                                                               |       |               |              |   |   |             |             |                                |
|-------------------------------------------------------------------------------|-------|---------------|--------------|---|---|-------------|-------------|--------------------------------|
| T-Cell antigen Receptor (TCR) pathway during Staphylococcus aureus            | 2/62  | 0.09284918575 | 0.2734830562 | 0 | 0 | 4.04396728  | 9.61161554  | DLG1;PIK3CA                    |
| TGF-beta Signaling Pathway WP366                                              | 3/132 | 0.09601442458 | 0.277756014  | 0 | 0 | 2.828883147 | 6.628799791 | PPM1A;ZFYVE16;SPTBN1           |
| Cell-type Dependent Selectivity of CCK2R Signaling WP3679                     | 1/13  | 0.102127274   | 0.2784862815 | 0 | 0 | 10.0726626  | 22.98113689 | GNAI1                          |
| Genes targeted by miRNAs in adipocytes WP1992                                 | 1/13  | 0.102127274   | 0.2784862815 | 0 | 0 | 10.0726626  | 22.98113689 | PTBP2                          |
| Mammary gland development pathway - Puberty (Stage 2 of 4) WP2814             | 1/13  | 0.102127274   | 0.2784862815 | 0 | 0 | 10.0726626  | 22.98113689 | NRIP1                          |
| Human Thyroid Stimulating Hormone (TSH) signaling pathway WP2032              | 2/66  | 0.1031430672  | 0.2784862815 | 0 | 0 | 3.790452454 | 8.610536789 | PIK3CA;GNAI1                   |
| Cysteine and methionine catabolism WP4504                                     | 1/14  | 0.1095395298  | 0.2901857274 | 0 | 0 | 9.297373358 | 20.56086033 | GCLC                           |
| AMP-activated Protein Kinase (AMPK) Signaling WP1403                          | 2/69  | 0.1110587352  | 0.2901857274 | 0 | 0 | 3.620181302 | 7.956058228 | PIK3CA;LEP                     |
| Brain-Derived Neurotrophic Factor (BDNF) signaling pathway WP2380             | 3/144 | 0.1165548274  | 0.2997124133 | 0 | 0 | 2.58655109  | 5.559516088 | DLG1;RANBP9;IRS2               |
| Primary Focal Segmental Glomerulosclerosis FSGS WP2572                        | 2/72  | 0.1191276157  | 0.3015417774 | 0 | 0 | 3.46450482  | 7.370941734 | LRP5;UTRN                      |
| Nuclear Receptors Meta-Pathway WP2882                                         | 5/319 | 0.124689727   | 0.3041280184 | 0 | 0 | 1.942774682 | 4.044714698 | EPB41L4B;GCLC;NRIP1;IRS2;FGF13 |
| Prolactin Signaling Pathway WP2037                                            | 2/76  | 0.1301034834  | 0.3041280184 | 0 | 0 | 3.27657105  | 6.682321303 | PIK3CA;IRS2                    |
| Leptin signaling pathway WP2034                                               | 2/76  | 0.1301034834  | 0.3041280184 | 0 | 0 | 3.27657105  | 6.682321303 | ROCK2;LEP                      |
| NOTCH1 regulation of human endothelial cell calcification WP3413              | 1/17  | 0.1314133413  | 0.3041280184 | 0 | 0 | 7.552972561 | 15.32806027 | ITGA1                          |
| Amplification and Expansion of Oncogenic Pathways as Metastatic Traits WP3678 | 1/17  | 0.1314133413  | 0.3041280184 | 0 | 0 | 7.552972561 | 15.32806027 | TCF7L2                         |
| miR-509-3p alteration of YAP1/ECM axis WP3967                                 | 1/17  | 0.1314133413  | 0.3041280184 | 0 | 0 | 7.552972561 | 15.32806027 | TEAD1                          |
| Breast cancer pathway WP4262                                                  | 3/154 | 0.1348119635  | 0.3075521129 | 0 | 0 | 2.414029924 | 4.837412608 | TCF7L2;PIK3CA;LRP5             |
| Nonalcoholic fatty liver disease WP4396                                       | 3/155 | 0.136689828   | 0.3075521129 | 0 | 0 | 2.398026316 | 4.772170566 | PIK3CA;LEP;IRS2                |
| Small Ligand GPCRs WP247                                                      | 1/19  | 0.1456983292  | 0.3174720595 | 0 | 0 | 6.713075881 | 12.93084111 | PTGER3                         |
| Farnesoid X Receptor Pathway WP2879                                           | 1/19  | 0.1456983292  | 0.3174720595 | 0 | 0 | 6.713075881 | 12.93084111 | IRS2                           |
| Signaling Pathways in Glioblastoma WP2261                                     | 2/82  | 0.1469778053  | 0.3174720595 | 0 | 0 | 3.029907975 | 5.80976882  | PIK3CA;FGFR2                   |
| Viral Acute Myocarditis WP4298                                                | 2/84  | 0.1526991521  | 0.3213764616 | 0 | 0 | 2.955708514 | 5.554620507 | BNIP2;AIF1                     |
| BMP Signaling Pathway in Eyelid Development WP3927                            | 1/20  | 0.1527530095  | 0.3213764616 | 0 | 0 | 6.359435173 | 11.94895247 | FGFR2                          |
| Nicotine Activity on Dopaminergic Neurons WP1602                              | 1/21  | 0.1597497837  | 0.3224282165 | 0 | 0 | 6.041158537 | 11.08037003 | GNAI1                          |
| Tamoxifen metabolism WP691                                                    | 1/21  | 0.1597497837  | 0.3224282165 | 0 | 0 | 6.041158537 | 11.08037003 | FMO3                           |
| PI3K/AKT/mTOR - VitD3 Signalling WP4141                                       | 1/22  | 0.1666891242  | 0.3224282165 | 0 | 0 | 5.753193961 | 10.30756459 | PIK3CA                         |
| Regulation of Apoptosis by Parathyroid Hormone-related Protein WP3872         | 1/22  | 0.1666891242  | 0.3224282165 | 0 | 0 | 5.753193961 | 10.30756459 | BCL2L13                        |
| miRNA targets in ECM and membrane receptors WP2911                            | 1/22  | 0.1666891242  | 0.3224282165 | 0 | 0 | 5.753193961 | 10.30756459 | ITGA1                          |
| Methionine De Novo and Salvage Pathway WP3580                                 | 1/22  | 0.1666891242  | 0.3224282165 | 0 | 0 | 5.753193961 | 10.30756459 | MSRB3                          |
| Pancreatic adenocarcinoma pathway WP4263                                      | 2/89  | 0.1671850011  | 0.3224282165 | 0 | 0 | 2.78513504  | 4.981643733 | PIK3CA;ARHGEF6                 |
| ErbB Signaling Pathway WP673                                                  | 2/91  | 0.1730447867  | 0.3232021028 | 0 | 0 | 2.722272007 | 4.775422718 | PIK3CA;CRK                     |
| Estrogen signaling pathway WP712                                              | 1/23  | 0.1735714996  | 0.3232021028 | 0 | 0 | 5.491407982 | 9.616365099 | PIK3CA                         |
| Glutathione metabolism WP100                                                  | 1/23  | 0.1735714996  | 0.3232021028 | 0 | 0 | 5.491407982 | 9.616365099 | GCLC                           |
| Photodynamic therapy-induced NFE2L2 (NRF2) survival signaling WP3612          | 1/24  | 0.1803973747  | 0.3247152744 | 0 | 0 | 5.252386002 | 8.995200678 | GCLC                           |
| IL1 and megakaryocytes in obesity WP2865                                      | 1/24  | 0.1803973747  | 0.3247152744 | 0 | 0 | 5.252386002 | 8.995200678 | PIK3CA                         |
| miRNA regulation of p53 pathway in prostate cancer WP3982                     | 1/24  | 0.1803973747  | 0.3247152744 | 0 | 0 | 5.252386002 | 8.995200678 | SIAH1                          |
| Differentiation of white and brown adipocyte WP2895                           | 1/25  | 0.1871672105  | 0.3271749707 | 0 | 0 | 5.03328252  | 8.43453772  | LEP                            |
| Signal Transduction of S1P Receptor WP26                                      | 1/25  | 0.1871672105  | 0.3271749707 | 0 | 0 | 5.03328252  | 8.43453772  | GNAI1                          |
| Metapathway biotransformation Phase I and II WP702                            | 3/183 | 0.1925078589  | 0.3271749707 | 0 | 0 | 2.022119342 | 3.331680833 | GLYAT;FMO3;CHST3               |
| EPO Receptor Signaling WP581                                                  | 1/26  | 0.1938814641  | 0.3271749707 | 0 | 0 | 4.831707317 | 7.926456035 | IRS2                           |
| Glucuronidation WP698                                                         | 1/26  | 0.1938814641  | 0.3271749707 | 0 | 0 | 4.831707317 | 7.926456035 | UGP2                           |
| Wnt/beta-catenin Signaling Pathway in Leukemia WP3658                         | 1/26  | 0.1938814641  | 0.3271749707 | 0 | 0 | 4.831707317 | 7.926456035 | LRP5                           |
| Sphingolipid pathway WP1422                                                   | 1/27  | 0.2005405894  | 0.3315058722 | 0 | 0 | 4.645637899 | 7.464325789 | SERINC1                        |
| Intraflagellar transport proteins binding to dynein WP4532                    | 1/27  | 0.2005405894  | 0.3315058722 | 0 | 0 | 4.645637899 | 7.464325789 | DYNC1L12                       |
| Nanoparticle-mediated activation of receptor signaling WP2643                 | 1/28  | 0.207145036   | 0.3389646044 | 0 | 0 | 4.4733514   | 7.04255848  | ITGA1                          |
| PDGFR-beta pathway WP3972                                                     | 1/29  | 0.2136952504  | 0.3427587185 | 0 | 0 | 4.31337108  | 6.656412982 | PIK3CA                         |
| Lipid Metabolism Pathway WP3965                                               | 1/29  | 0.2136952504  | 0.3427587185 | 0 | 0 | 4.31337108  | 6.656412982 | PLIN1                          |
| PI3K-AKT-mTOR signaling pathway and therapeutic opportunities WP3844          | 1/30  | 0.220191675   | 0.3497161898 | 0 | 0 | 4.164423886 | 6.30184302  | PIK3CA                         |
| Trans-sulfuration and one carbon metabolism WP2525                            | 1/31  | 0.226634749   | 0.3557498946 | 0 | 0 | 4.025406504 | 5.975376181 | GCLC                           |
| DNA Damage Response (only ATM dependent) WP710                                | 2/110 | 0.2300162981  | 0.3557498946 | 0 | 0 | 2.241195183 | 3.293671897 | TCF7L2;PIK3CA                  |
| Alpha 6 Beta 4 signaling pathway WP244                                        | 1/33  | 0.2393625834  | 0.3557498946 | 0 | 0 | 3.7734375   | 5.395169587 | IRS2                           |
| Oxidative Stress WP408                                                        | 1/33  | 0.2393625834  | 0.3557498946 | 0 | 0 | 3.7734375   | 5.395169587 | GCLC                           |
| Pregnane X Receptor pathway WP2876                                            | 1/33  | 0.2393625834  | 0.3557498946 | 0 | 0 | 3.7734375   | 5.395169587 | NRIP1                          |
| Resistin as a regulator of inflammation WP4481                                | 1/33  | 0.2393625834  | 0.3557498946 | 0 | 0 | 3.7734375   | 5.395169587 | PIK3CA                         |
| miRNA regulation of prostate cancer signaling pathways WP3981                 | 1/33  | 0.2393625834  | 0.3557498946 | 0 | 0 | 3.7734375   | 5.395169587 | PIK3CA                         |
| Wnt Signaling in Kidney Disease WP4150                                        | 1/36  | 0.2580649778  | 0.3787602581 | 0 | 0 | 3.449477352 | 4.672468415 | LRP5                           |
| Photodynamic therapy-induced HIF-1 survival signaling WP3614                  | 1/37  | 0.2641969702  | 0.3787602581 | 0 | 0 | 3.35348916  | 4.463696472 | ANGPT1                         |
| Fibrin Complement Receptor 3 Signaling Pathway WP4136                         | 1/37  | 0.2641969702  | 0.3787602581 | 0 | 0 | 3.35348916  | 4.463696472 | ITGAM                          |

|                                                                                       |       |              |              |   |   |              |              |                  |
|---------------------------------------------------------------------------------------|-------|--------------|--------------|---|---|--------------|--------------|------------------|
| Melatonin metabolism and effects WP3298                                               | 1/37  | 0.2641969702 | 0.3787602581 | 0 | 0 | 3.35348916   | 4.463696472  | ECE1             |
| Bladder Cancer WP2828                                                                 | 1/40  | 0.2822923363 | 0.3942358489 | 0 | 0 | 3.095059412  | 3.914668568  | DAPK2            |
| Ferroptosis WP4313                                                                    | 1/40  | 0.2822923363 | 0.3942358489 | 0 | 0 | 3.095059412  | 3.914668568  | GCLC             |
| Glycogen Synthesis and Degradation WP500                                              | 1/40  | 0.2822923363 | 0.3942358489 | 0 | 0 | 3.095059412  | 3.914668568  | UGP2             |
| Ebola Virus Pathway on Host WP4217                                                    | 2/129 | 0.2880225914 | 0.3988005111 | 0 | 0 | 1.904062606  | 2.370017875  | PIK3CA;ITGA1     |
| Common Pathways Underlying Drug Addiction WP2636                                      | 1/42  | 0.2941094763 | 0.4037774166 | 0 | 0 | 2.943783462  | 3.602611658  | GNAI1            |
| Vitamin A and Carotenoid Metabolism WP716                                             | 1/43  | 0.2999453194 | 0.4083289222 | 0 | 0 | 2.8735482    | 3.46019769   | RDH10            |
| VEGFA-VEGFR2 Signaling Pathway WP3888                                                 | 3/236 | 0.3088172661 | 0.4169033092 | 0 | 0 | 1.557939914  | 1.830588044  | PIK3CA;ROCK2;CRK |
| Prostaglandin Synthesis and Regulation WP98                                           | 1/45  | 0.3114735261 | 0.4170141423 | 0 | 0 | 2.742655211  | 3.199145303  | PTGER3           |
| Regulation of Microtubule Cytoskeleton WP2038                                         | 1/46  | 0.31716667   | 0.4194118675 | 0 | 0 | 2.681571816  | 3.079323653  | PIK3CA           |
| Regulation of toll-like receptor signaling pathway WP1449                             | 2/139 | 0.3184423438 | 0.4194118675 | 0 | 0 | 1.764184318  | 2.018780539  | PIK3CA;RNF41     |
| Thymic Stromal LymphoPoietin (TSLP) Signaling Pathway WP2203                          | 1/47  | 0.3228130225 | 0.421739594  | 0 | 0 | 2.623144221  | 2.965941956  | PIK3CA           |
| Rett syndrome causing genes WP4312                                                    | 1/48  | 0.3284129659 | 0.4222452419 | 0 | 0 | 2.567202906  | 2.858537872  | CRK              |
| Exercise-induced Circadian Regulation WP410                                           | 1/48  | 0.3284129659 | 0.4222452419 | 0 | 0 | 2.567202906  | 2.858537872  | UGP2             |
| Synaptic signaling pathways associated with autism spectrum disorder WP4539           | 1/50  | 0.3394751386 | 0.4297588887 | 0 | 0 | 2.462170234  | 2.66001685   | PIK3CA           |
| NRF2 pathway WP2884                                                                   | 2/146 | 0.3395625787 | 0.4297588887 | 0 | 0 | 1.677828903  | 1.812218003  | GCLC;FGF13       |
| Calcium Regulation in the Cardiac Cell WP536                                          | 2/149 | 0.3485552013 | 0.4332649001 | 0 | 0 | 1.643337089  | 1.732009364  | GJA4;GNAI1       |
| One carbon metabolism and related pathways WP3940                                     | 1/52  | 0.3503561846 | 0.4332649001 | 0 | 0 | 2.365375418  | 2.480817499  | GCLC             |
| Translation Factors WP107                                                             | 1/52  | 0.3503561846 | 0.4332649001 | 0 | 0 | 2.365375418  | 2.480817499  | PAIP1            |
| Apoptosis-related network due to altered Notch3 in ovarian cancer WP2864              | 1/53  | 0.3557297082 | 0.4365773691 | 0 | 0 | 2.319770169  | 2.397677523  | GCLC             |
| Cardiac Hypertrophic Response WP2795                                                  | 1/55  | 0.3663445763 | 0.4396134916 | 0 | 0 | 2.23362692   | 2.242965542  | FGFR2            |
| Pathogenic Escherichia coli infection WP2272                                          | 1/55  | 0.3663445763 | 0.4396134916 | 0 | 0 | 2.23362692   | 2.242965542  | ROCK2            |
| Hematopoietic Stem Cell Differentiation WP2849                                        | 1/55  | 0.3663445763 | 0.4396134916 | 0 | 0 | 2.23362692   | 2.242965542  | ACVR1B           |
| EGF/EGFR Signaling Pathway WP437                                                      | 2/162 | 0.3870109506 | 0.4576861887 | 0 | 0 | 1.508819018  | 1.43232535   | PXDN;CRK         |
| Kit receptor signaling pathway WP304                                                  | 1/59  | 0.387055604  | 0.4576861887 | 0 | 0 | 2.079163162  | 1.973514471  | CRK              |
| Genotoxicity pathway WP4286                                                           | 1/63  | 0.4070936593 | 0.4778925566 | 0 | 0 | 1.944630212  | 1.747662505  | SEL1L            |
| Pathways Affected in Adenoid Cystic Carcinoma WP3651                                  | 1/65  | 0.4168671431 | 0.4844991056 | 0 | 0 | 1.88366997   | 1.648188073  | PIK3CA           |
| Non-small cell lung cancer WP4255                                                     | 1/66  | 0.421693666  | 0.4844991056 | 0 | 0 | 1.854596623  | 1.60139993   | PIK3CA           |
| Association Between Physico-Chemical Features and Toxicity Associated Pathways WP3680 | 1/66  | 0.421693666  | 0.4844991056 | 0 | 0 | 1.854596623  | 1.60139993   | ROCK2            |
| PPAR signaling pathway WP3942                                                         | 1/67  | 0.4264804804 | 0.4865481537 | 0 | 0 | 1.826404287  | 1.556441058  | PLIN1            |
| Sterol Regulatory Element-Binding Proteins (SREBP) signalling WP1982                  | 1/69  | 0.4359362798 | 0.4938578834 | 0 | 0 | 1.772507174  | 1.471640377  | PIK3CA           |
| Parkin-Ubiquitin Proteasomal System pathway WP2359                                    | 1/70  | 0.4406059062 | 0.4956816445 | 0 | 0 | 1.746730293  | 1.431627903  | SIAH1            |
| Ras Signaling WP4223                                                                  | 2/184 | 0.4496808236 | 0.5024020236 | 0 | 0 | 1.324951122  | 1.058923764  | PIK3CA;FGFR2     |
| Chromosomal and microsatellite instability in colorectal cancer WP4216                | 1/73  | 0.4543854876 | 0.5041811575 | 0 | 0 | 1.673695799  | 1.320226895  | TCF7L2           |
| Peptide GPCRs WP24                                                                    | 1/74  | 0.4589032878 | 0.5057301539 | 0 | 0 | 1.650684932  | 1.285744562  | NPY1R            |
| Pathways in clear cell renal cell carcinoma WP4018                                    | 1/85  | 0.5062106872 | 0.5540954819 | 0 | 0 | 1.433725319  | 0.9760835216 | PBRM1            |
| Androgen receptor signaling pathway WP138                                             | 1/90  | 0.5263322083 | 0.568438785  | 0 | 0 | 1.352836394  | 0.8682810944 | ROCK2            |
| T-Cell antigen Receptor (TCR) Signaling Pathway WP69                                  | 1/90  | 0.5263322083 | 0.568438785  | 0 | 0 | 1.352836394  | 0.8682810944 | CRK              |
| GPCRs, Other WP117                                                                    | 1/91  | 0.530257622  | 0.5688856607 | 0 | 0 | 1.337737127  | 0.848650148  | ADGRF5           |
| TNF alpha Signaling Pathway WP231                                                     | 1/92  | 0.5341507002 | 0.5692921936 | 0 | 0 | 1.322969713  | 0.8296042357 | OTUD7B           |
| G Protein Signaling Pathways WP35                                                     | 1/93  | 0.5380117076 | 0.5696594551 | 0 | 0 | 1.30852333   | 0.8111208438 | GNAI1            |
| B Cell Receptor Signaling Pathway WP23                                                | 1/97  | 0.5531402491 | 0.5818748075 | 0 | 0 | 1.253747459  | 0.7423986527 | CRK              |
| Neural Crest Differentiation WP2064                                                   | 1/101 | 0.5677762852 | 0.5934177949 | 0 | 0 | 1.203353659  | 0.6811316263 | FGFR2            |
| Toll-like Receptor Signaling Pathway WP75                                             | 1/103 | 0.5749146148 | 0.5970267154 | 0 | 0 | 1.179638929  | 0.6529699542 | PIK3CA           |
| Thermogenesis WP4321                                                                  | 1/108 | 0.5922519084 | 0.6111134342 | 0 | 0 | 1.124230682  | 0.5888981284 | PLIN1            |
| GPCRs, Class A Rhodopsin-like WP455                                                   | 2/257 | 0.6285807256 | 0.6444941617 | 0 | 0 | 0.9421388187 | 0.4374264024 | PTGER3;NPY1R     |
| mRNA Processing WP411                                                                 | 1/126 | 0.649045434  | 0.6612915743 | 0 | 0 | 0.9614634146 | 0.4155950209 | PTBP2            |
| Ectoderm Differentiation WP2858                                                       | 1/138 | 0.6824657016 | 0.6909965228 | 0 | 0 | 0.8767135482 | 0.3349422805 | FGFR2            |
| Mesodermal Commitment Pathway WP2857                                                  | 1/147 | 0.7054370223 | 0.7098186187 | 0 | 0 | 0.8222936853 | 0.2869293318 | TEAD1            |
| Ciliary landscape WP4352                                                              | 1/216 | 0.8345543067 | 0.8345543067 | 0 | 0 | 0.55643789   | 0.100635944  | RANBP9           |
