# Supplementary material
Source: PubMed Central journal article supplement (PMC11533588)
Supplement: NIHMS1924044-supplement-st10.pdf [file NIHMS1924044-supplement-st10.pdf]

Supplemental Table 10: List of HCl pathways enriched among PAC-coexpressed genes. Term, which pathway; Overlap, number of genes that overlap and total genes; P-value, enrichment p-value; Adjusted P-value, Q-value; Odds Ratio, enrichment; Combined Score, approximation of overall association ( $-\log_{10}(P) * \log(\text{Odds})$ ), Genes, genes in the pathway which are co-expressed with COBLL1.

| Term                                                                                                    | Overlap | P-value        | Adjusted P-value | Old P-value | Old Adjusted P-value | Odds Ratio  | Combined Score | Genes                               |
|---------------------------------------------------------------------------------------------------------|---------|----------------|------------------|-------------|----------------------|-------------|----------------|-------------------------------------|
| Integrin-linked kinase signaling Homo sapiens 21738158-6194-11e5-8ac5-06603eb7f303                      | 5/45    | 3.37E-05       | 0.003600712643   | 0           | 0                    | 15.46484375 | 159.279421     | PPP1R14A;ARHGEF7;LIMS2;TNS1;ARHGEF6 |
| Signaling events mediated by focal adhesion kinase Homo sapiens 8fb80085-6195-11e5-8ac5-                | 5/58    | 1.16E-04       | 0.006193572074   | 0           | 0                    | 11.66391509 | 105.7208509    | PIK3CA;ROCK2;PTPN21;ARHGEF7;CRK     |
| E-cadherin signaling in the nascent adherens junction Homo sapiens aef0d8c2-6191-11e5-8ac5-06603eb7f303 | 4/39    | 2.93E-04       | 0.01046151033    | 0           | 0                    | 14.05501331 | 114.3272589    | TJP1;DLG1;PIK3CA;CRK                |
| VEGFR3 signaling in lymphatic endothelium Homo sapiens 9048d98c-6196-11e5-8ac5-06603eb7f303             | 3/25    | 0.001109703492 | 0.02905211847    | 0           | 0                    | 16.67760943 | 113.4688246    | PIK3CA;ITGA1;CRK                    |
| IGF1 pathway Homo sapiens 5e904cd6-6193-11e5-8ac5-06603eb7f303                                          | 3/28    | 0.001552216019 | 0.02905211847    | 0           | 0                    | 14.67407407 | 94.91296294    | PIK3CA;IRS2;CRK                     |
| Nectin adhesion pathway Homo sapiens 685baa82-6194-11e5-8ac5-06603eb7f303                               | 3/29    | 0.001720898249 | 0.02905211847    | 0           | 0                    | 14.10897436 | 89.80233628    | PIK3CA;PTPRM;CRK                    |
| Regulation of CDC42 activity Homo sapiens 0ffe6681-6195-11e5-8ac5-06603eb7f303                          | 3/30    | 0.001900605881 | 0.02905211847    | 0           | 0                    | 13.58573388 | 85.12253726    | ITSN1;ARHGEF7;ARHGFE6               |
| CDC42 signaling events Homo sapiens 50b98ae0-6190-11e5-8ac5-06603eb7f303                                | 4/70    | 0.002682635008 | 0.03588024324    | 0           | 0                    | 7.441746659 | 44.06225271    | DLG1;PIK3CA;ARHGEF7;ARHGFE6         |
| Signaling events regulated by Ret tyrosine kinase Homo sapiens e4431190-6195-11e5-8ac5-06603eb7f303     | 3/38    | 0.003763345993 | 0.03883069402    | 0           | 0                    | 10.47619048 | 58.48277627    | PIK3CA;IRS2;CRK                     |
| EPHB forward signaling Homo sapiens 01c81f4a-6192-11e5-8ac5-06603eb7f303                                | 3/39    | 0.004052516484 | 0.03883069402    | 0           | 0                    | 10.18467078 | 56.10141609    | PIK3CA;ITSN1;CRK                    |
| Plasma membrane estrogen receptor signaling Homo sapiens dcc37895-6194-11e5-8ac5-06603eb7f303           | 3/40    | 0.004354844189 | 0.03883069402    | 0           | 0                    | 9.908908909 | 53.86945081    | PIK3CA;ROCK2;GNAI1                  |
| Internalization of ErbB1 Homo sapiens 3aa9aafa-6194-11e5-8ac5-06603eb7f303                              | 3/40    | 0.004354844189 | 0.03883069402    | 0           | 0                    | 9.908908909 | 53.86945081    | PIK3CA;ITSN1;ARHGFE7                |
| PAR1-mediated thrombin signaling events Homo sapiens be5084c0-6194-11e5-8ac5-06603eb7f303               | 3/43    | 0.00534245545  | 0.04397251793    | 0           | 0                    | 9.164351852 | 47.94852957    | PIK3CA;ROCK2;GNAI1                  |
| Angiotensin receptor Tie2-mediated signaling Homo sapiens ad60647c-6188-11e5-8ac5-06603eb7f303          | 3/48    | 0.007266330027 | 0.05553552235    | 0           | 0                    | 8.144032922 | 40.10532209    | ANGPT1;PIK3CA;CRK                   |
| Signaling events mediated by PTP1B Homo sapiens be498a9b-6195-11e5-8ac5-06603eb7f303                    | 3/52    | 0.009064913001 | 0.06344692205    | 0           | 0                    | 7.477702192 | 35.17020598    | PIK3CA;LEP;CRK                      |
| CXCR4-mediated signaling events Homo sapiens 46a5529b-6191-11e5-8ac5-06603eb7f303                       | 4/100   | 0.009487390212 | 0.06344692205    | 0           | 0                    | 5.108436853 | 23.79403482    | PIK3CA;ITGA1;CRK;GNAI1              |
| SHP2 signaling Homo sapiens 85755aa4-6195-11e5-8ac5-06603eb7f303                                        | 3/57    | 0.01164854846  | 0.0733173344     | 0           | 0                    | 6.783607682 | 30.20451317    | PIK3CA;ANGPT1;GNAI1                 |
| PDGFR-alpha signaling pathway Homo sapiens c66cc833-6194-11e5-8ac5-06603eb7f303                         | 2/22    | 0.01402373867  | 0.0833633354     | 0           | 0                    | 12.15644172 | 51.87158259    | PIK3CA;CRK                          |
| Integrin family cell surface interactions Homo sapiens 1ca2bf67-6194-11e5-8ac5-06603eb7f303             | 2/26    | 0.01931095986  | 0.108751195      | 0           | 0                    | 10.12832311 | 39.97732665    | ITGAM;ITGA1                         |
| Nongenotropic Androgen signaling Homo sapiens 843e2f77-6194-11e5-8ac5-06603eb7f303                      | 2/30    | 0.02529901189  | 0.1251412801     | 0           | 0                    | 8.679666959 | 31.91504809    | PIK3CA;GNAI1                        |

|                                                                                                                          |      |               |              |   |   |             |             |                   |
|--------------------------------------------------------------------------------------------------------------------------|------|---------------|--------------|---|---|-------------|-------------|-------------------|
| Signaling events mediated by Hepatocyte Growth Factor Receptor (c-Met) Homo sapiens ac39d2b9-6195-11e5-8ac5-06603eb7f303 | 3/77 | 0.02585736009 | 0.1251412801 | 0 | 0 | 4.945195195 | 18.07547965 | PIK3CA;RANBP9;CRK |
| Osteopontin-mediated events Homo sapiens 94bf7f2a-6194-11e5-8ac5-06603eb7f303                                            | 2/31 | 0.0268995275  | 0.1251412801 | 0 | 0 | 8.379944997 | 30.29891928 | PIK3CA;ROCK2      |
| Nephrin/Neph1 signaling in the kidney podocyte Homo sapiens 6cfb9873-6194-11e5-8ac5-06603eb7f303                         | 2/31 | 0.0268995275  | 0.1251412801 | 0 | 0 | 8.379944997 | 30.29891928 | TJP1;PIK3CA       |
| N-cadherin signaling events Homo sapiens 5fc9c1e1-6194-11e5-8ac5-06603eb7f303                                            | 2/34 | 0.0319371572  | 0.1366910328 | 0 | 0 | 7.593174847 | 26.15078137 | PIK3CA;LRP5       |
| EGF receptor (ErbB1) signaling pathway Homo sapiens NULL                                                                 | 2/34 | 0.0319371572  | 0.1366910328 | 0 | 0 | 7.593174847 | 26.15078137 | PIK3CA;GNAI1      |
| Regulation of RAC1 activity Homo sapiens 351aacd6-6195-11e5-8ac5-06603eb7f303                                            | 2/38 | 0.03917718682 | 0.1612291919 | 0 | 0 | 6.748125426 | 21.86163654 | ARHGEF7;ARHGEF6   |
| Urokinase-type plasminogen activator (uPA) and uPAR-mediated signaling Homo sapiens 503076a2-6196-11e5-8ac5-06603eb7f303 | 2/42 | 0.04697331103 | 0.17331532   | 0 | 0 | 6.07208589  | 18.56950545 | ITGAM;CRK         |
| Signaling events mediated by TCPTP Homo sapiens cd5ca44d-6195-11e5-8ac5-06603eb7f303                                     | 2/42 | 0.04697331103 | 0.17331532   | 0 | 0 | 6.07208589  | 18.56950545 | PIK3CA;ITGA1      |
| BMP receptor signaling Homo sapiens 2a3c66e7-618e-11e5-8ac5-06603eb7f303                                                 | 2/42 | 0.04697331103 | 0.17331532   | 0 | 0 | 6.07208589  | 18.56950545 | PPM1A;ZFYVE16     |
| CXCR3-mediated signaling events Homo sapiens 3a38a0ca-6191-11e5-8ac5-06603eb7f303                                        | 2/43 | 0.0490040877  | 0.1747812461 | 0 | 0 | 5.923686967 | 17.86496059 | PIK3CA;GNAI1      |
| ErbB2/ErbB3 signaling events Homo sapiens 51e35311-6192-11e5-8ac5-06603eb7f303                                           | 2/44 | 0.05106623494 | 0.1762608754 | 0 | 0 | 5.78235466  | 17.20037584 | PIK3CA;RNF41      |
| S1P5 pathway Homo sapiens 845321c3-6195-11e5-8ac5-06603eb7f303                                                           | 1/8  | 0.06413600988 | 0.2144547831 | 0 | 0 | 17.271777   | 47.44124133 | GNAI1             |
| TGF-beta receptor signaling Homo sapiens 1f188fcc-6196-11e5-8ac5-06603eb7f303                                            | 2/54 | 0.07327446892 | 0.2375869144 | 0 | 0 | 4.668003775 | 12.20002878 | ZFYVE16;SPTBN1    |
| IL2-mediated signaling events Homo sapiens a2a1883c-6193-11e5-8ac5-06603eb7f303                                          | 2/55 | 0.07564068724 | 0.2380456922 | 0 | 0 | 4.579696724 | 11.82368216 | PIK3CA;IRS2       |
| Fc-epsilon receptor I signaling in mast cells Homo sapiens 86cd7795-6192-11e5-8ac5-06603eb7f303                          | 2/58 | 0.08288187427 | 0.2467977965 | 0 | 0 | 4.33369851  | 10.79237792 | FCER1G;PIK3CA     |
| FGF signaling pathway Homo sapiens 98ed0df6-6192-11e5-8ac5-06603eb7f303                                                  | 2/59 | 0.08534129411 | 0.2467977965 | 0 | 0 | 4.25745345  | 10.47800522 | PIK3CA;FGFR2      |
| Coregulation of Androgen receptor activity Homo sapiens 27e0e369-6191-11e5-8ac5-06603eb7f303                             | 2/59 | 0.08534129411 | 0.2467977965 | 0 | 0 | 4.25745345  | 10.47800522 | LATS2;NRIP1       |
| IL4-mediated signaling events Homo sapiens cff33f50-6193-11e5-8ac5-06603eb7f303                                          | 2/60 | 0.08782266764 | 0.2472901431 | 0 | 0 | 4.183837529 | 10.17691551 | PIK3CA;IRS2       |
| Neurotrophic factor-mediated Trk receptor signaling Homo sapiens 774988f5-6194-11e5-8ac5-06603eb7f303                    | 2/61 | 0.09032547059 | 0.2478160347 | 0 | 0 | 4.112717064 | 9.888352838 | PIK3CA;CRK        |
| Endothelins Homo sapiens dfb9dc47-6191-11e5-8ac5-06603eb7f303                                                            | 2/63 | 0.09539330293 | 0.2551770853 | 0 | 0 | 3.977471588 | 9.346051545 | CRK;GNAI1         |
| LPA receptor mediated events Homo sapiens 4b994cde-6194-11e5-8ac5-06603eb7f303                                           | 2/65 | 0.1005407368  | 0.2623868008 | 0 | 0 | 3.850813127 | 8.846058235 | CRK;GNAI1         |

|                                                                                                                              |      |              |              |   |   |             |             |                 |  |  |
|------------------------------------------------------------------------------------------------------------------------------|------|--------------|--------------|---|---|-------------|-------------|-----------------|--|--|
| S1P4 pathway Homo sapiens 821b0c12-6195-11e5-8ac5-06603eb7f303                                                               | 1/14 | 0.1095395298 | 0.2663802202 | 0 | 0 | 9.297373358 | 20.56086033 | GNAI1           |  |  |
| IL5-mediated signaling events Homo sapiens e1d816a1-6193-11e5-8ac5-06603eb7f303                                              | 1/14 | 0.1095395298 | 0.2663802202 | 0 | 0 | 9.297373358 | 20.56086033 | PIK3CA          |  |  |
| JNK signaling in the CD4+ TCR pathway Homo sapiens 400ebdab-6194-11e5-8ac5-06603eb7f303                                      | 1/14 | 0.1095395298 | 0.2663802202 | 0 | 0 | 9.297373358 | 20.56086033 | CRK             |  |  |
| PAR4-mediated thrombin signaling events Homo sapiens c3b87da1-6194-11e5-8ac5-06603eb7f303                                    | 1/15 | 0.1168909629 | 0.2779407341 | 0 | 0 | 8.632839721 | 18.5305089  | ROCK2           |  |  |
| Atypical NF-kappaB pathway Homo sapiens d2dd121d-618b-11e5-8ac5-06603eb7f303                                                 | 1/17 | 0.1314133413 | 0.2991750535 | 0 | 0 | 7.552972561 | 15.32806027 | PIK3CA          |  |  |
| Regulation of cytoplasmic and nuclear SMAD2/3 signaling Homo sapiens 13312fe2-6195-11e5-8ac5-06603eb7f303                    | 1/17 | 0.1314133413 | 0.2991750535 | 0 | 0 | 7.552972561 | 15.32806027 | PPM1A           |  |  |
| Regulation of nuclear beta catenin signaling and target gene transcription Homo sapiens 1590a3b3-6195-11e5-8ac5-06603eb7f303 | 2/79 | 0.138483738  | 0.3026249697 | 0 | 0 | 3.148434388 | 6.224470543 | TCF7L2;CTNNBIP1 |  |  |
| EPHA2 forward signaling Homo sapiens fb172ba9-6191-11e5-8ac5-06603eb7f303                                                    | 1/18 | 0.1385852665 | 0.3026249697 | 0 | 0 | 7.108321377 | 14.04795874 | PIK3CA          |  |  |
| E-cadherin signaling in keratinocytes Homo sapiens a5f1af61-6191-11e5-8ac5-06603eb7f303                                      | 1/21 | 0.1597497837 | 0.3287159011 | 0 | 0 | 6.041158537 | 11.08037003 | PIK3CA          |  |  |
| S1P1 pathway Homo sapiens 7327884f-6195-11e5-8ac5-06603eb7f303                                                               | 1/21 | 0.1597497837 | 0.3287159011 | 0 | 0 | 6.041158537 | 11.08037003 | GNAI1           |  |  |
| Sphingosine 1-phosphate (S1P) pathway Homo sapiens eff796f3-6195-11e5-8ac5-06603eb7f303                                      | 1/21 | 0.1597497837 | 0.3287159011 | 0 | 0 | 6.041158537 | 11.08037003 | GNAI1           |  |  |
| Signaling events mediated by the Hedgehog family Homo sapiens d3a49cee-6195-11e5-8ac5-06603eb7f303                           | 1/22 | 0.1666891242 | 0.3365233263 | 0 | 0 | 5.753193961 | 10.30756459 | PIK3CA          |  |  |
| Signaling events mediated by PRL Homo sapiens bb67523a-6195-11e5-8ac5-06603eb7f303                                           | 1/23 | 0.1735714996 | 0.3439287122 | 0 | 0 | 5.491407982 | 9.616365099 | ITGA1           |  |  |
| Plexin-D1 Signaling Homo sapiens e3068f36-6194-11e5-8ac5-06603eb7f303                                                        | 1/24 | 0.1803973747 | 0.3446878409 | 0 | 0 | 5.252386002 | 8.995200678 | ITGA1           |  |  |
| S1P2 pathway Homo sapiens 7796a240-6195-11e5-8ac5-06603eb7f303                                                               | 1/24 | 0.1803973747 | 0.3446878409 | 0 | 0 | 5.252386002 | 8.995200678 | GNAI1           |  |  |
| IL3-mediated signaling events Homo sapiens c868db9f-6193-11e5-8ac5-06603eb7f303                                              | 1/26 | 0.1938814641 | 0.3464780769 | 0 | 0 | 4.831707317 | 7.926456035 | PIK3CA          |  |  |
| VEGFR1 specific signals Homo sapiens 8b13143b-6196-11e5-8ac5-06603eb7f303                                                    | 1/27 | 0.2005405894 | 0.3464780769 | 0 | 0 | 4.645637899 | 7.464325789 | PIK3CA          |  |  |
| Insulin-mediated glucose transport Homo sapiens 145e3376-6194-11e5-8ac5-06603eb7f303                                         | 1/27 | 0.2005405894 | 0.3464780769 | 0 | 0 | 4.645637899 | 7.464325789 | LNPEP           |  |  |
| TRAIL signaling pathway Homo sapiens 3a79fddf-6196-11e5-8ac5-06603eb7f303                                                    | 1/28 | 0.207145036  | 0.3464780769 | 0 | 0 | 4.4733514   | 7.04255848  | PIK3CA          |  |  |
| Retinoic acid receptors-mediated signaling Homo sapiens 5797691b-6195-11e5-8ac5-06603eb7f303                                 | 1/28 | 0.207145036  | 0.3464780769 | 0 | 0 | 4.4733514   | 7.04255848  | NRIP1           |  |  |
| Wnt signaling network Homo sapiens 987a2b9f-6196-11e5-8ac5-06603eb7f303                                                      | 1/28 | 0.207145036  | 0.3464780769 | 0 | 0 | 4.4733514   | 7.04255848  | LRP5            |  |  |
| Beta2 integrin cell surface interactions Homo sapiens 95b6b434-618d-11e5-8ac5-06603eb7f303                                   | 1/29 | 0.2136952504 | 0.3464780769 | 0 | 0 | 4.31337108  | 6.656412982 | ITGAM           |  |  |

|                                                                                                                  |       |              |              |   |   |             |             |            |  |  |
|------------------------------------------------------------------------------------------------------------------|-------|--------------|--------------|---|---|-------------|-------------|------------|--|--|
| Reelin signaling pathway Homo sapiens 054f432f-6195-11e5-8ac5-06603eb7f303                                       | 1/29  | 0.2136952504 | 0.3464780769 | 0 | 0 | 4.31337108  | 6.656412982 | PIK3CA     |  |  |
| S1P3 pathway Homo sapiens 7cb02d01-6195-11e5-8ac5-06603eb7f303                                                   | 1/29  | 0.2136952504 | 0.3464780769 | 0 | 0 | 4.31337108  | 6.656412982 | GNAI1      |  |  |
| IL2 signaling events mediated by STAT5 Homo sapiens 9938526b-6193-11e5-8ac5-06603eb7f303                         | 1/30  | 0.220191675  | 0.3464780769 | 0 | 0 | 4.164423886 | 6.30184302  | PIK3CA     |  |  |
| Netrin-mediated signaling events Homo sapiens 716a3d34-6194-11e5-8ac5-06603eb7f303                               | 1/30  | 0.220191675  | 0.3464780769 | 0 | 0 | 4.164423886 | 6.30184302  | PIK3CA     |  |  |
| Ephrin B reverse signaling Homo sapiens 149a63dc-6192-11e5-8ac5-06603eb7f303                                     | 1/30  | 0.220191675  | 0.3464780769 | 0 | 0 | 4.164423886 | 6.30184302  | PIK3CA     |  |  |
| Aurora A signaling Homo sapiens f131cf8e-618b-11e5-8ac5-06603eb7f303                                             | 1/31  | 0.226634749  | 0.3514480891 | 0 | 0 | 4.025406504 | 5.975376181 | ARHGEF7    |  |  |
| Alpha4 beta1 integrin signaling events Homo sapiens aa07df5d-6187-11e5-8ac5-06603eb7f303                         | 1/32  | 0.2330249078 | 0.3557193948 | 0 | 0 | 3.895357986 | 5.674017125 | CRK        |  |  |
| IL1-mediated signaling events Homo sapiens 68fce8e7-6193-11e5-8ac5-06603eb7f303                                  | 1/33  | 0.2393625834 | 0.3557193948 | 0 | 0 | 3.7734375   | 5.395169587 | PIK3CA     |  |  |
| EPO signaling pathway Homo sapiens 20fe3c0e-6192-11e5-8ac5-06603eb7f303                                          | 1/33  | 0.2393625834 | 0.3557193948 | 0 | 0 | 3.7734375   | 5.395169587 | IRS2       |  |  |
| EPHA forward signaling Homo sapiens f25420e8-6191-11e5-8ac5-06603eb7f303                                         | 1/34  | 0.2456482042 | 0.3600596966 | 0 | 0 | 3.658906135 | 5.136573052 | CRK        |  |  |
| IL2 signaling events mediated by PI3K Homo sapiens 8bbf39aa-6193-11e5-8ac5-06603eb7f303                          | 1/35  | 0.2518821951 | 0.363328324  | 0 | 0 | 3.551111908 | 4.896251013 | PIK3CA     |  |  |
| GMCSF-mediated signaling events Homo sapiens 095aa3ef-6193-11e5-8ac5-06603eb7f303                                | 1/36  | 0.2580649778 | 0.363328324  | 0 | 0 | 3.449477352 | 4.672468415 | PIK3CA     |  |  |
| Trk receptor signaling mediated by PI3K and PLC-gamma Homo sapiens 4037def0-6196-11e5-8ac5-06603eb7f303          | 1/36  | 0.2580649778 | 0.363328324  | 0 | 0 | 3.449477352 | 4.672468415 | PIK3CA     |  |  |
| IL23-mediated signaling events Homo sapiens b71d0ffd-6193-11e5-8ac5-06603eb7f303                                 | 1/37  | 0.2641969702 | 0.3660735293 | 0 | 0 | 3.35348916  | 4.463696472 | PIK3CA     |  |  |
| ErbB4 signaling events Homo sapiens 6104ebb2-6192-11e5-8ac5-06603eb7f303                                         | 1/38  | 0.270278587  | 0.3660735293 | 0 | 0 | 3.262689519 | 4.26858338  | PIK3CA     |  |  |
| FAS (CD95) signaling pathway Homo sapiens 79cc9c14-6192-11e5-8ac5-06603eb7f303                                   | 1/38  | 0.270278587  | 0.3660735293 | 0 | 0 | 3.262689519 | 4.26858338  | PIK3CA     |  |  |
| amb2 Integrin signaling Homo sapiens 5d4f90b6-6188-11e5-8ac5-06603eb7f303                                        | 1/40  | 0.2822923363 | 0.3718511648 | 0 | 0 | 3.095059412 | 3.914668568 | ITGAM      |  |  |
| IFN-gamma pathway Homo sapiens 51b1ed75-6193-11e5-8ac5-06603eb7f303                                              | 1/40  | 0.2822923363 | 0.3718511648 | 0 | 0 | 3.095059412 | 3.914668568 | PIK3CA     |  |  |
| PDGFR-beta signaling pathway Homo sapiens c901a3e4-6194-11e5-8ac5-06603eb7f303                                   | 2/128 | 0.2849700516 | 0.3718511648 | 0 | 0 | 1.919271594 | 2.409398258 | PIK3CA;CRK |  |  |
| Insulin Pathway Homo sapiens 073b9f25-6194-11e5-8ac5-06603eb7f303                                                | 1/43  | 0.2999453194 | 0.3813127381 | 0 | 0 | 2.8735482   | 3.46019769  | PIK3CA     |  |  |
| FOXA1 transcription factor network Homo sapiens aa3927b7-6192-11e5-8ac5-06603eb7f303                             | 1/44  | 0.3057332054 | 0.3813127381 | 0 | 0 | 2.806579694 | 3.325916035 | NRIP1      |  |  |
| a6b1 and a6b4 Integrin signaling Homo sapiens 73d1a893-6186-11e5-8ac5-06603eb7f303                               | 1/45  | 0.3114735261 | 0.3813127381 | 0 | 0 | 2.742655211 | 3.199145303 | PIK3CA     |  |  |
| RhoA signaling pathway Homo sapiens 5c6b5f5c-6195-11e5-8ac5-06603eb7f303                                         | 1/45  | 0.3114735261 | 0.3813127381 | 0 | 0 | 2.742655211 | 3.199145303 | ROCK2      |  |  |
| TNF receptor signaling pathway Homo sapiens 316be05e-6196-11e5-8ac5-06603eb7f303                                 | 1/46  | 0.31716667   | 0.3813127381 | 0 | 0 | 2.681571816 | 3.079323653 | MAP4K3     |  |  |
| IL6-mediated signaling events Homo sapiens e684d5d2-6193-11e5-8ac5-06603eb7f303                                  | 1/46  | 0.31716667   | 0.3813127381 | 0 | 0 | 2.681571816 | 3.079323653 | PIK3CA     |  |  |
| PLK1 signaling events Homo sapiens e5e87977-6194-11e5-8ac5-06603eb7f303                                          | 1/46  | 0.31716667   | 0.3813127381 | 0 | 0 | 2.681571816 | 3.079323653 | ROCK2      |  |  |
| Hedgehog signaling events mediated by Gli proteins Homo sapiens 153b6970-6193-11e5-8ac5-06603eb7f303             | 1/47  | 0.3228130225 | 0.3837888157 | 0 | 0 | 2.623144221 | 2.965941956 | GNAI1      |  |  |
| Class I PI3K signaling events Homo sapiens 12b82bb7-6191-11e5-8ac5-06603eb7f303                                  | 1/48  | 0.3284129659 | 0.386155905  | 0 | 0 | 2.567202906 | 2.858537872 | PIK3CA     |  |  |
| Arf6 trafficking events Homo sapiens 7a5b8f09-618a-11e5-8ac5-06603eb7f303                                        | 1/49  | 0.3339668792 | 0.3884180009 | 0 | 0 | 2.51359248  | 2.756690693 | ITGA1      |  |  |
| Signaling events mediated by Stem cell factor receptor (c-Kit) Homo sapiens c6b6861c-6195-11e5-8ac5-06603eb7f303 | 1/52  | 0.3503561846 | 0.3988096995 | 0 | 0 | 2.365375418 | 2.480817499 | PIK3CA     |  |  |
| Regulation of Androgen receptor activity Homo sapiens 094a8cb0-6195-11e5-8ac5-06603eb7f303                       | 1/52  | 0.3503561846 | 0.3988096995 | 0 | 0 | 2.365375418 | 2.480817499 | APPBP2     |  |  |
| RAC1 signaling pathway Homo sapiens faffa4fc-6194-11e5-8ac5-06603eb7f303                                         | 1/54  | 0.3610590517 | 0.4066665109 | 0 | 0 | 2.275885872 | 2.318476245 | CRK        |  |  |

|                                                                                                            |       |              |              |   |   |             |              |        |  |  |
|------------------------------------------------------------------------------------------------------------|-------|--------------|--------------|---|---|-------------|--------------|--------|--|--|
| Validated targets of C-MYC transcriptional repression<br>Homo sapiens 6bbdafa6-6196-11e5-8ac5-06603eb7f303 | 1/63  | 0.4070936593 | 0.4452935607 | 0 | 0 | 1.944630212 | 1.747662505  | CSDE1  |  |  |
| BCR signaling pathway Homo sapiens acbf44e2-618c-11e5-8ac5-06603eb7f303                                    | 1/64  | 0.4120005842 | 0.4452935607 | 0 | 0 | 1.91366628  | 1.696906279  | PIK3CA |  |  |
| Validated nuclear estrogen receptor alpha network<br>Homo sapiens 58949883-6196-11e5-8ac5-06603eb7f303     | 1/64  | 0.4120005842 | 0.4452935607 | 0 | 0 | 1.91366628  | 1.696906279  | NRIP1  |  |  |
| Regulation of retinoblastoma protein Homo sapiens 407a3468-6195-11e5-8ac5-06603eb7f303                     | 1/64  | 0.4120005842 | 0.4452935607 | 0 | 0 | 1.91366628  | 1.696906279  | ATF7   |  |  |
| Beta1 integrin cell surface interactions Homo sapiens 2fd0bc63-618d-11e5-8ac5-06603eb7f303                 | 1/66  | 0.421693666  | 0.4467447749 | 0 | 0 | 1.854596623 | 1.60139993   | ITGA1  |  |  |
| HIF-1-alpha transcription factor network Homo sapiens 20ef2b81-6193-11e5-8ac5-06603eb7f303                 | 1/66  | 0.421693666  | 0.4467447749 | 0 | 0 | 1.854596623 | 1.60139993   | LEP    |  |  |
| p75(NTR)-mediated signaling Homo sapiens b492782f-6194-11e5-8ac5-06603eb7f303                              | 1/68  | 0.4312279109 | 0.4479746259 | 0 | 0 | 1.799053513 | 1.513217252  | PIK3CA |  |  |
| Signaling events mediated by VEGFR1 and VEGFR2<br>Homo sapiens d6f6ae1f-6195-11e5-8ac5-06603eb7f303        | 1/68  | 0.4312279109 | 0.4479746259 | 0 | 0 | 1.799053513 | 1.513217252  | PIK3CA |  |  |
| AP-1 transcription factor network Homo sapiens 3ce2f9c5-6189-11e5-8ac5-06603eb7f303                        | 1/69  | 0.4359362798 | 0.4485113648 | 0 | 0 | 1.772507174 | 1.471640377  | TCF7L2 |  |  |
| Integrins in angiogenesis Homo sapiens 2ddeac89-6194-11e5-8ac5-06603eb7f303                                | 1/72  | 0.4498301972 | 0.4583983914 | 0 | 0 | 1.697354861 | 1.35599152   | PIK3CA |  |  |
| Glucocorticoid receptor regulatory network Homo sapiens dfba0dfb-6192-11e5-8ac5-06603eb7f303               | 1/82  | 0.4937323236 | 0.4983901757 | 0 | 0 | 1.487052093 | 1.049504508  | VIPR1  |  |  |
| ErbB1 downstream signaling Homo sapiens 30d60550-6192-11e5-8ac5-06603eb7f303                               | 1/105 | 0.5819357547 | 0.5819357547 | 0 | 0 | 1.156836304 | 0.6263056505 | PIK3CA |  |  |
