# Supplementary material
Source: PubMed Central journal article supplement (PMC11533588)
Supplement: NIHMS1924044-supplement-st11.pdf [file NIHMS1924044-supplement-st11.pdf]

Supplemental Figure 11: Differences in morphological profiles of siCOBLL- and siNT-treated AMSCs at day14 of differentiation. AP features, Adipocyte Profiler feature name; pvalue, q-value, t-statistics of comparison.

| AP features                                          | pvalue | q-value | t-statistics |
|------------------------------------------------------|--------|---------|--------------|
| Cells_AreaShape_Area                                 | 0.0243 | 0.0360  | 4.2101       |
| Cells_AreaShape_Extent                               | 0.0332 | 0.0396  | -3.3896      |
| Cells_AreaShape_MajorAxisLength                      | 0.0249 | 0.0366  | 3.5869       |
| Cells_AreaShape_MaxFeretDiameter                     | 0.0121 | 0.0253  | 4.7060       |
| Cells_AreaShape_Perimeter                            | 0.0109 | 0.0253  | 7.1338       |
| Cells_AreaShape_Zernike_4_4                          | 0.0342 | 0.0404  | -3.5356      |
| Cells_Children_LargeBODIPYObjects_Count              | 0.0064 | 0.0253  | -7.3667      |
| Cells_Correlation_Correlation_BODIPY_AGP             | 0.0062 | 0.0253  | 5.6509       |
| Cells_Correlation_Correlation_Mito_AGP               | 0.0350 | 0.0407  | 3.7886       |
| Cells_Correlation_Correlation_Mito_BODIPY            | 0.0138 | 0.0262  | 4.3484       |
| Cells_Correlation_K_Mito_AGP                         | 0.0319 | 0.0392  | 3.3510       |
| Cells_Correlation_K_Mito_BODIPY                      | 0.0264 | 0.0375  | 4.0663       |
| Cells_Granularity_11_BODIPY                          | 0.0486 | 0.0491  | 2.8876       |
| Cells_Granularity_3_BODIPY                           | 0.0484 | 0.0489  | -3.5220      |
| Cells_Granularity_8_Mito                             | 0.0448 | 0.0468  | 2.9000       |
| Cells_Intensity_IntegratedIntensity_AGP              | 0.0102 | 0.0253  | 7.9337       |
| Cells_Intensity_IntegratedIntensityEdge_AGP          | 0.0127 | 0.0253  | 8.5298       |
| Cells_Intensity_IntegratedIntensityEdge_BODIPY       | 0.0407 | 0.0442  | -3.3538      |
| Cells_Intensity_LowerQuartileIntensity_AGP           | 0.0028 | 0.0253  | 6.8475       |
| Cells_Intensity_LowerQuartileIntensity_BODIPY        | 0.0115 | 0.0253  | -4.4546      |
| Cells_Intensity_MADIntensity_AGP                     | 0.0149 | 0.0271  | 4.7567       |
| Cells_Intensity_MassDisplacement_BODIPY              | 0.0019 | 0.0214  | 11.2167      |
| Cells_Intensity_MassDisplacement_Mito                | 0.0002 | 0.0147  | 21.7339      |
| Cells_Intensity_MaxIntensity_AGP                     | 0.0128 | 0.0253  | 4.6331       |
| Cells_Intensity_MaxIntensityEdge_AGP                 | 0.0037 | 0.0253  | 9.3496       |
| Cells_Intensity_MeanIntensity_AGP                    | 0.0032 | 0.0253  | 6.4003       |
| Cells_Intensity_MeanIntensityEdge_AGP                | 0.0104 | 0.0253  | 8.1166       |
| Cells_Intensity_MedianIntensity_AGP                  | 0.0031 | 0.0253  | 6.4014       |
| Cells_Intensity_MinIntensity_AGP                     | 0.0008 | 0.0164  | 9.1612       |
| Cells_Intensity_MinIntensityEdge_AGP                 | 0.0007 | 0.0164  | 10.2839      |
| Cells_Intensity_MinIntensityEdge_BODIPY              | 0.0117 | 0.0253  | -4.4907      |
| Cells_Intensity_StdIntensity_AGP                     | 0.0122 | 0.0253  | 5.2030       |
| Cells_Intensity_StdIntensityEdge_AGP                 | 0.0047 | 0.0253  | 6.9709       |
| Cells_Intensity_UpperQuartileIntensity_AGP           | 0.0041 | 0.0253  | 6.1030       |
| Cells_Mean_LargeBODIPYObjects_AreaShape_Center_X     | 0.0170 | 0.0291  | -5.0200      |
| Cells_Mean_LargeBODIPYObjects_AreaShape_Center_Z     | 0.0088 | 0.0253  | -5.0592      |
| Cells_Mean_LargeBODIPYObjects_AreaShape_Compactness  | 0.0088 | 0.0253  | -5.5559      |
| Cells_Mean_LargeBODIPYObjects_AreaShape_Eccentricity | 0.0073 | 0.0253  | -5.2952      |
| Cells_Mean_LargeBODIPYObjects_AreaShape_EulerNumber  | 0.0087 | 0.0253  | -5.0830      |
| Cells_Mean_LargeBODIPYObjects_AreaShape_Extent       | 0.0129 | 0.0253  | -4.5815      |
| Cells_Mean_LargeBODIPYObjects_AreaShape_FormFactor   | 0.0207 | 0.0323  | -4.1719      |

|                                                                     |        |        |         |
|---------------------------------------------------------------------|--------|--------|---------|
| Cells_Mean_LargeBODIPYObjects_AreaShape_Solidity                    | 0.0108 | 0.0253 | -4.7739 |
| Cells_Mean_LargeBODIPYObjects_Correlation_Correlation_BODIPY_AGP    | 0.0000 | 0.0060 | 45.0534 |
| Cells_Mean_LargeBODIPYObjects_Correlation_Correlation_Mito_AGP      | 0.0029 | 0.0253 | -6.9109 |
| Cells_Mean_LargeBODIPYObjects_Correlation_Correlation_Mito_BODIPY   | 0.0004 | 0.0164 | 10.7637 |
| Cells_Mean_LargeBODIPYObjects_Correlation_K_AGP_BODIPY              | 0.0302 | 0.0386 | -3.4324 |
| Cells_Mean_LargeBODIPYObjects_Correlation_K_Mito_AGP                | 0.0260 | 0.0374 | 3.4761  |
| Cells_Mean_LargeBODIPYObjects_Correlation_K_Mito_BODIPY             | 0.0279 | 0.0381 | 3.4429  |
| Cells_Mean_LargeBODIPYObjects_Correlation_Overlap_BODIPY_AGP        | 0.0168 | 0.0290 | -4.1035 |
| Cells_Mean_LargeBODIPYObjects_Correlation_Overlap_Mito_AGP          | 0.0098 | 0.0253 | -4.8818 |
| Cells_Mean_LargeBODIPYObjects_Correlation_Overlap_Mito_BODIPY       | 0.0161 | 0.0283 | -4.2111 |
| Cells_Mean_LargeBODIPYObjects_Granularity_10_BODIPY                 | 0.0208 | 0.0323 | 5.2476  |
| Cells_Mean_LargeBODIPYObjects_Granularity_3_BODIPY                  | 0.0045 | 0.0253 | -5.7960 |
| Cells_Mean_LargeBODIPYObjects_Intensity_MinIntensity_BODIPY         | 0.0176 | 0.0297 | -4.0559 |
| Cells_Mean_LargeBODIPYObjects_Intensity_MinIntensityEdge_BODIPY     | 0.0177 | 0.0297 | -4.0507 |
| Cells_Mean_LargeBODIPYObjects_Location_Center_X                     | 0.0170 | 0.0291 | -5.0212 |
| Cells_Mean_LargeBODIPYObjects_Location_CenterMassIntensity_X_BODIPY | 0.0170 | 0.0291 | -5.0216 |
| Cells_Mean_LargeBODIPYObjects_Location_MaxIntensity_X_BODIPY        | 0.0171 | 0.0291 | -5.0256 |
| Cells_Mean_LargeBODIPYObjects_Number_Object_Number                  | 0.0012 | 0.0177 | -8.3021 |
| Cells_Neighbors_FirstClosestDistance_10                             | 0.0110 | 0.0253 | 5.1159  |
| Cells_Neighbors_FirstClosestDistance_Adjacent                       | 0.0110 | 0.0253 | 5.1159  |
| Cells_Neighbors_FirstClosestObjectNumber_10                         | 0.0139 | 0.0262 | -4.5929 |
| Cells_Neighbors_FirstClosestObjectNumber_Adjacent                   | 0.0139 | 0.0262 | -4.5929 |
| Cells_Neighbors_SecondClosestDistance_10                            | 0.0271 | 0.0378 | 4.6651  |
| Cells_Neighbors_SecondClosestDistance_Adjacent                      | 0.0271 | 0.0378 | 4.6651  |
| Cells_Neighbors_SecondClosestObjectNumber_10                        | 0.0126 | 0.0253 | -4.6259 |
| Cells_Neighbors_SecondClosestObjectNumber_Adjacent                  | 0.0126 | 0.0253 | -4.6259 |
| Cells_Number_Object_Number                                          | 0.0127 | 0.0253 | -4.6547 |
| Cells_RadialDistribution_FracAtD_Mito_1of4                          | 0.0294 | 0.0386 | 3.6724  |
| Cells_RadialDistribution_MeanFrac_AGP_3of4                          | 0.0449 | 0.0468 | 2.8836  |
| Cells_RadialDistribution_MeanFrac_Mito_4of4                         | 0.0195 | 0.0316 | -4.6966 |
| Cells_RadialDistribution_RadialCV_AGP_4of4                          | 0.0262 | 0.0375 | -3.7993 |
| Cells_RadialDistribution_RadialCV_BODIPY_2of4                       | 0.0376 | 0.0423 | 3.0617  |
| Cells_RadialDistribution_RadialCV_Mito_2of4                         | 0.0051 | 0.0253 | 5.5567  |
| Cells_Texture_AngularSecondMoment_AGP_20_00                         | 0.0421 | 0.0451 | -2.9748 |
| Cells_Texture_AngularSecondMoment_Mito_10_01                        | 0.0376 | 0.0423 | 4.6736  |
| Cells_Texture_Contrast_AGP_10_00                                    | 0.0448 | 0.0468 | 3.1024  |
| Cells_Texture_Correlation_AGP_20_01                                 | 0.0272 | 0.0378 | 4.7706  |
| Cells_Texture_Correlation_BODIPY_10_01                              | 0.0388 | 0.0431 | 4.2045  |
| Cells_Texture_Correlation_Mito_5_02                                 | 0.0059 | 0.0253 | 5.8347  |
| Cells_Texture_DifferenceEntropy_AGP_5_00                            | 0.0357 | 0.0411 | 3.3332  |
| Cells_Texture_DifferenceEntropy_Mito_20_01                          | 0.0460 | 0.0475 | -3.1953 |
| Cells_Texture_DifferenceVariance_Mito_10_01                         | 0.0395 | 0.0436 | 4.7080  |
| Cells_Texture_Entropy_AGP_5_01                                      | 0.0182 | 0.0300 | 4.3073  |

|                                                    |        |        |         |
|----------------------------------------------------|--------|--------|---------|
| Cells_Texture_Entropy_Mito_20_00                   | 0.0403 | 0.0439 | -3.4410 |
| Cells_Texture_InfoMeas1_AGP_20_00                  | 0.0363 | 0.0413 | -3.8141 |
| Cells_Texture_InfoMeas1_BODIPY_5_02                | 0.0399 | 0.0437 | -3.0024 |
| Cells_Texture_InfoMeas1_Mito_10_01                 | 0.0206 | 0.0323 | -4.7398 |
| Cells_Texture_InverseDifferenceMoment_AGP_20_03    | 0.0471 | 0.0481 | -3.6963 |
| Cells_Texture_InverseDifferenceMoment_Mito_20_01   | 0.0208 | 0.0323 | 3.7009  |
| Cells_Texture_SumAverage_AGP_20_03                 | 0.0128 | 0.0253 | 5.6297  |
| Cells_Texture_SumEntropy_AGP_5_01                  | 0.0159 | 0.0282 | 5.1481  |
| Cells_Texture_SumEntropy_Mito_20_03                | 0.0466 | 0.0479 | -3.2644 |
| Cells_Texture_SumVariance_AGP_5_02                 | 0.0096 | 0.0253 | 6.0441  |
| Cells_Texture_Variance_AGP_5_02                    | 0.0122 | 0.0253 | 5.3694  |
| Cytoplasm_AreaShape_Area                           | 0.0261 | 0.0374 | 4.1195  |
| Cytoplasm_AreaShape_Compactness                    | 0.0153 | 0.0276 | 4.2984  |
| Cytoplasm_AreaShape_Extent                         | 0.0166 | 0.0290 | -4.1935 |
| Cytoplasm_AreaShape_FormFactor                     | 0.0064 | 0.0253 | -7.7320 |
| Cytoplasm_AreaShape_MajorAxisLength                | 0.0241 | 0.0359 | 3.6067  |
| Cytoplasm_AreaShape_MaxFeretDiameter               | 0.0121 | 0.0253 | 4.7060  |
| Cytoplasm_AreaShape_Perimeter                      | 0.0081 | 0.0253 | 7.2861  |
| Cytoplasm_AreaShape_Zernike_8_8                    | 0.0483 | 0.0489 | -2.8355 |
| Cytoplasm_Correlation_Correlation_BODIPY_AGP       | 0.0055 | 0.0253 | 5.8211  |
| Cytoplasm_Correlation_Correlation_Mito_BODIPY      | 0.0090 | 0.0253 | 4.9344  |
| Cytoplasm_Correlation_K_Mito_AGP                   | 0.0299 | 0.0386 | 3.4021  |
| Cytoplasm_Correlation_K_Mito_BODIPY                | 0.0258 | 0.0373 | 4.0678  |
| Cytoplasm_Granularity_11_BODIPY                    | 0.0471 | 0.0481 | 2.9069  |
| Cytoplasm_Granularity_9_BODIPY                     | 0.0458 | 0.0475 | 3.8191  |
| Cytoplasm_Granularity_9_Mito                       | 0.0292 | 0.0386 | 5.3502  |
| Cytoplasm_Intensity_IntegratedIntensity_AGP        | 0.0113 | 0.0253 | 7.7759  |
| Cytoplasm_Intensity_IntegratedIntensityEdge_AGP    | 0.0111 | 0.0253 | 8.6662  |
| Cytoplasm_Intensity_IntegratedIntensityEdge_BODIPY | 0.0407 | 0.0442 | -3.3431 |
| Cytoplasm_Intensity_LowerQuartileIntensity_AGP     | 0.0031 | 0.0253 | 6.9773  |
| Cytoplasm_Intensity_LowerQuartileIntensity_BODIPY  | 0.0105 | 0.0253 | -4.5561 |
| Cytoplasm_Intensity_MADIntensity_AGP               | 0.0127 | 0.0253 | 4.7144  |
| Cytoplasm_Intensity_MassDisplacement_BODIPY        | 0.0017 | 0.0206 | 11.3823 |
| Cytoplasm_Intensity_MassDisplacement_Mito          | 0.0003 | 0.0147 | 21.6648 |
| Cytoplasm_Intensity_MaxIntensity_AGP               | 0.0126 | 0.0253 | 4.6396  |
| Cytoplasm_Intensity_MaxIntensityEdge_AGP           | 0.0058 | 0.0253 | 5.3742  |
| Cytoplasm_Intensity_MeanIntensity_AGP              | 0.0029 | 0.0253 | 6.4794  |
| Cytoplasm_Intensity_MeanIntensityEdge_AGP          | 0.0059 | 0.0253 | 8.2149  |
| Cytoplasm_Intensity_MedianIntensity_AGP            | 0.0026 | 0.0253 | 6.6893  |
| Cytoplasm_Intensity_MinIntensity_AGP               | 0.0008 | 0.0164 | 9.1879  |
| Cytoplasm_Intensity_MinIntensity_BODIPY            | 0.0201 | 0.0323 | -3.7593 |
| Cytoplasm_Intensity_MinIntensityEdge_AGP           | 0.0007 | 0.0164 | 10.2880 |
| Cytoplasm_Intensity_MinIntensityEdge_BODIPY        | 0.0188 | 0.0308 | -3.8421 |

|                                                      |        |        |          |
|------------------------------------------------------|--------|--------|----------|
| Cytoplasm_Intensity_StdIntensity_AGP                 | 0.0115 | 0.0253 | 5.1045   |
| Cytoplasm_Intensity_StdIntensityEdge_AGP             | 0.0074 | 0.0253 | 5.0802   |
| Cytoplasm_Intensity_UpperQuartileIntensity_AGP       | 0.0037 | 0.0253 | 6.0958   |
| Cytoplasm_Number_Object_Number                       | 0.0127 | 0.0253 | -4.6547  |
| Cytoplasm_Parent_Cells                               | 0.0127 | 0.0253 | -4.6547  |
| Cytoplasm_RadialDistribution_FracAtD_Mito_1of4       | 0.0233 | 0.0348 | -3.6518  |
| Cytoplasm_RadialDistribution_RadialCV_AGP_1of4       | 0.0001 | 0.0101 | -14.9563 |
| Cytoplasm_RadialDistribution_RadialCV_BODIPY_2of4    | 0.0156 | 0.0279 | 4.1361   |
| Cytoplasm_RadialDistribution_RadialCV_Mito_4of4      | 0.0017 | 0.0208 | 7.6019   |
| Cytoplasm_Texture_AngularSecondMoment_Mito_10_01     | 0.0309 | 0.0390 | 5.1197   |
| Cytoplasm_Texture_Contrast_AGP_5_02                  | 0.0466 | 0.0479 | 3.0394   |
| Cytoplasm_Texture_Correlation_AGP_20_01              | 0.0325 | 0.0392 | 3.7190   |
| Cytoplasm_Texture_Correlation_BODIPY_5_01            | 0.0466 | 0.0479 | 2.9766   |
| Cytoplasm_Texture_Correlation_Mito_5_02              | 0.0125 | 0.0253 | 5.3732   |
| Cytoplasm_Texture_DifferenceEntropy_AGP_5_00         | 0.0297 | 0.0386 | 3.4155   |
| Cytoplasm_Texture_DifferenceEntropy_Mito_20_01       | 0.0408 | 0.0442 | -3.3896  |
| Cytoplasm_Texture_DifferenceVariance_Mito_10_01      | 0.0360 | 0.0412 | 4.9768   |
| Cytoplasm_Texture_Entropy_AGP_5_01                   | 0.0325 | 0.0392 | 4.0343   |
| Cytoplasm_Texture_Entropy_Mito_20_00                 | 0.0346 | 0.0404 | -3.6911  |
| Cytoplasm_Texture_InfoMeas1_AGP_20_03                | 0.0488 | 0.0492 | -3.8374  |
| Cytoplasm_Texture_InfoMeas1_BODIPY_5_02              | 0.0417 | 0.0449 | -2.9574  |
| Cytoplasm_Texture_InfoMeas1_Mito_10_02               | 0.0142 | 0.0265 | -5.3994  |
| Cytoplasm_Texture_InverseDifferenceMoment_AGP_20_01  | 0.0432 | 0.0457 | -3.7076  |
| Cytoplasm_Texture_InverseDifferenceMoment_Mito_20_01 | 0.0178 | 0.0297 | 3.8919   |
| Cytoplasm_Texture_SumAverage_AGP_20_03               | 0.0142 | 0.0265 | 5.4477   |
| Cytoplasm_Texture_SumEntropy_AGP_5_01                | 0.0294 | 0.0386 | 4.7114   |
| Cytoplasm_Texture_SumEntropy_Mito_10_03              | 0.0493 | 0.0495 | -3.1907  |
| Cytoplasm_Texture_SumVariance_AGP_5_02               | 0.0110 | 0.0253 | 5.6227   |
| Cytoplasm_Texture_Variance_AGP_5_02                  | 0.0143 | 0.0266 | 5.0206   |
