# Supplementary material
Source: PubMed Central journal article supplement (PMC11533588)
Supplement: NIHMS1924044-supplement-st12.pdf [file NIHMS1924044-supplement-st12.pdf]

Supplemental Figure 12: Differences in morphological profiles between TT (n=7) and CC (n=6) allele carriers at day 14 in subcutaneous AMSCs. Results of multi-way ANOVA with significance level 5% FDR. AP features, Adipocyte Profiler feature name; pvalue, q-value, t-statistics of comparison.

| AP features                                                  | pvalue | q-value | effect size (eta_sq) | t-test  |
|--------------------------------------------------------------|--------|---------|----------------------|---------|
| Cells_AreaShape_FormFactor                                   | 0.0389 | 0.0395  | 0.3000               | 1.9862  |
| Cells_AreaShape_Solidity                                     | 0.0136 | 0.0313  | 0.4180               | 2.8491  |
| Cells_AreaShape_Zernike_8_8                                  | 0.0170 | 0.0326  | 0.3550               | 2.6712  |
| Cells_Children_LargeBODIPYObjects_Count                      | 0.0186 | 0.0339  | 0.4990               | 2.3018  |
| Cells_Granularity_14_AGP                                     | 0.0123 | 0.0304  | 0.2630               | 1.9214  |
| Cells_Granularity_14_BODIPY                                  | 0.0042 | 0.0298  | 0.5370               | 1.5891  |
| Cells_Granularity_7_AGP                                      | 0.0257 | 0.0365  | 0.3810               | -2.0191 |
| Cells_Granularity_5_BODIPY                                   | 0.0491 | 0.0425  | 0.2730               | 2.1404  |
| Cells_Granularity_8_Mito                                     | 0.0213 | 0.0349  | 0.1120               | -1.1109 |
| Cells_Intensity_LowerQuartileIntensity_Mito                  | 0.0206 | 0.0348  | 0.3700               | 2.1866  |
| Cells_Intensity_MADIntensity_AGP                             | 0.0017 | 0.0298  | 0.0580               | -1.1573 |
| Cells_Intensity_MassDisplacement_AGP                         | 0.0209 | 0.0349  | 0.2720               | -1.7026 |
| Cells_Intensity_MassDisplacement_BODIPY                      | 0.0028 | 0.0298  | 0.3480               | -2.5211 |
| Cells_Intensity_MassDisplacement_Mito                        | 0.0297 | 0.0374  | 0.2040               | -1.3490 |
| Cells_Intensity_MaxIntensity_AGP                             | 0.0242 | 0.0365  | 0.0680               | -1.1854 |
| Cells_Intensity_MeanIntensityEdge_Mito                       | 0.0454 | 0.0412  | 0.3330               | 2.0549  |
| Cells_Intensity_MedianIntensity_Mito                         | 0.0395 | 0.0396  | 0.3120               | 2.0166  |
| Cells_Intensity_MinIntensity_Mito                            | 0.0259 | 0.0365  | 0.4250               | 2.7873  |
| Cells_Intensity_MinIntensityEdge_Mito                        | 0.0264 | 0.0366  | 0.4220               | 2.7584  |
| Cells_Intensity_StdIntensity_AGP                             | 0.0128 | 0.0304  | 0.0960               | -1.3545 |
| Cells_Mean_LargeBODIPYObjects_AreaShape_Orientation          | 0.0020 | 0.0298  | 0.2580               | 1.7141  |
| Cells_Mean_LargeBODIPYObjects_Correlation_Overlap_BODIPY_AGP | 0.0277 | 0.0374  | 0.2690               | 2.3174  |
| Cells_Mean_LargeBODIPYObjects_Granularity_5_BODIPY           | 0.0482 | 0.0423  | 0.4710               | 2.5675  |
| Cells_Neighbors_AngleBetweenNeighbors_10                     | 0.0296 | 0.0374  | 0.3170               | 2.2575  |
| Cells_Neighbors_AngleBetweenNeighbors_Adjacent               | 0.0296 | 0.0374  | 0.3170               | 2.2575  |
| Cells_RadialDistribution_MeanFrac_AGP_1of4                   | 0.0118 | 0.0304  | 0.5930               | -3.7736 |
| Cells_RadialDistribution_MeanFrac_Mito_3of4                  | 0.0326 | 0.0375  | 0.3170               | -1.9113 |
| Cells_RadialDistribution_RadialCV_BODIPY_3of4                | 0.0070 | 0.0298  | 0.2500               | -2.1039 |
| Cells_RadialDistribution_RadialCV_Mito_1of4                  | 0.0474 | 0.0418  | 0.2080               | 1.7808  |
| Cells_Texture_AngularSecondMoment_AGP_20_03                  | 0.0360 | 0.0384  | 0.0460               | 0.9478  |
| Cells_Texture_AngularSecondMoment_Mito_20_03                 | 0.0362 | 0.0384  | 0.2800               | -1.8302 |
| Cells_Texture_Contrast_AGP_20_01                             | 0.0146 | 0.0313  | 0.0940               | -1.3760 |

|                                                   |        |        |        |         |
|---------------------------------------------------|--------|--------|--------|---------|
| Cells_Texture_Correlation_AGP_20_03               | 0.0289 | 0.0374 | 0.4880 | -2.2589 |
| Cells_Texture_Correlation_Mito_20_00              | 0.0141 | 0.0313 | 0.2810 | -1.9104 |
| Cells_Texture_DifferenceEntropy_AGP_20_01         | 0.0170 | 0.0326 | 0.0730 | -1.1987 |
| Cells_Texture_DifferenceVariance_AGP_20_01        | 0.0157 | 0.0321 | 0.0670 | 1.1178  |
| Cells_Texture_Entropy_AGP_20_03                   | 0.0022 | 0.0298 | 0.0680 | -1.1877 |
| Cells_Texture_InverseDifferenceMoment_AGP_5_00    | 0.0099 | 0.0298 | 0.0370 | 0.9324  |
| Cells_Texture_SumEntropy_AGP_20_00                | 0.0014 | 0.0298 | 0.1060 | -1.4187 |
| Cells_Texture_SumEntropy_BODIPY_20_03             | 0.0432 | 0.0403 | 0.4170 | 2.0075  |
| Cells_Texture_SumVariance_AGP_20_00               | 0.0045 | 0.0298 | 0.1530 | -1.6931 |
| Cells_Texture_Variance_AGP_20_01                  | 0.0063 | 0.0298 | 0.1240 | -1.5378 |
| Cytoplasm_AreaShape_FormFactor                    | 0.0330 | 0.0375 | 0.2970 | 2.3550  |
| Cytoplasm_AreaShape_Solidity                      | 0.0249 | 0.0365 | 0.3410 | 2.8358  |
| Cytoplasm_AreaShape_Zernike_8_8                   | 0.0182 | 0.0336 | 0.3490 | 2.6257  |
| Cytoplasm_Granularity_14_AGP                      | 0.0176 | 0.0332 | 0.2390 | 1.8178  |
| Cytoplasm_Granularity_14_BODIPY                   | 0.0060 | 0.0298 | 0.5260 | 1.5386  |
| Cytoplasm_Granularity_7_AGP                       | 0.0286 | 0.0374 | 0.3410 | -1.7705 |
| Cytoplasm_Granularity_5_BODIPY                    | 0.0245 | 0.0365 | 0.3810 | 2.6321  |
| Cytoplasm_Granularity_8_Mito                      | 0.0183 | 0.0336 | 0.0900 | -0.9719 |
| Cytoplasm_Intensity_LowerQuartileIntensity_Mito   | 0.0202 | 0.0348 | 0.3820 | 2.2758  |
| Cytoplasm_Intensity_MADIntensity_AGP              | 0.0023 | 0.0298 | 0.0420 | -1.0256 |
| Cytoplasm_Intensity_MassDisplacement_AGP          | 0.0431 | 0.0403 | 0.2490 | -1.6158 |
| Cytoplasm_Intensity_MassDisplacement_BODIPY       | 0.0120 | 0.0304 | 0.3150 | -2.5346 |
| Cytoplasm_Intensity_MassDisplacement_Mito         | 0.0190 | 0.0340 | 0.2350 | -1.5019 |
| Cytoplasm_Intensity_MaxIntensity_AGP              | 0.0422 | 0.0403 | 0.0650 | -1.1326 |
| Cytoplasm_Intensity_MaxIntensityEdge_AGP          | 0.0286 | 0.0374 | 0.1000 | -1.3495 |
| Cytoplasm_Intensity_MedianIntensity_Mito          | 0.0347 | 0.0383 | 0.3310 | 2.0946  |
| Cytoplasm_Intensity_MinIntensity_Mito             | 0.0259 | 0.0365 | 0.4250 | 2.7874  |
| Cytoplasm_Intensity_MinIntensityEdge_Mito         | 0.0264 | 0.0366 | 0.4220 | 2.7587  |
| Cytoplasm_Intensity_StdIntensity_AGP              | 0.0195 | 0.0346 | 0.0920 | -1.3041 |
| Cytoplasm_Intensity_StdIntensityEdge_AGP          | 0.0129 | 0.0304 | 0.1040 | -1.4024 |
| Cytoplasm_RadialDistribution_FracAtD_AGP_3of4     | 0.0152 | 0.0317 | 0.3610 | 2.9312  |
| Cytoplasm_RadialDistribution_FracAtD_BODIPY_1of4  | 0.0030 | 0.0298 | 0.4720 | 3.3039  |
| Cytoplasm_RadialDistribution_MeanFrac_BODIPY_1of4 | 0.0023 | 0.0298 | 0.4540 | 3.1744  |
| Cytoplasm_Texture_AngularSecondMoment_AGP_20_03   | 0.0148 | 0.0313 | 0.0380 | 0.8972  |
| Cytoplasm_Texture_AngularSecondMoment_Mito_20_03  | 0.0313 | 0.0374 | 0.3060 | -1.9246 |

|                                                      |        |        |        |         |
|------------------------------------------------------|--------|--------|--------|---------|
| Cytoplasm_Texture_Contrast_AGP_20_01                 | 0.0190 | 0.0340 | 0.0910 | -1.3224 |
| Cytoplasm_Texture_Correlation_Mito_20_03             | 0.0321 | 0.0374 | 0.3750 | -2.1269 |
| Cytoplasm_Texture_DifferenceEntropy_AGP_20_01        | 0.0255 | 0.0365 | 0.0740 | -1.1954 |
| Cytoplasm_Texture_DifferenceVariance_AGP_5_02        | 0.0220 | 0.0358 | 0.0700 | 1.1405  |
| Cytoplasm_Texture_Entropy_AGP_20_01                  | 0.0068 | 0.0298 | 0.0580 | -1.1054 |
| Cytoplasm_Texture_InverseDifferenceMoment_AGP_5_00   | 0.0049 | 0.0298 | 0.0410 | 0.9550  |
| Cytoplasm_Texture_InverseDifferenceMoment_Mito_20_03 | 0.0473 | 0.0418 | 0.2710 | -1.7694 |
| Cytoplasm_Texture_SumEntropy_AGP_20_03               | 0.0075 | 0.0298 | 0.0900 | -1.3071 |
| Cytoplasm_Texture_SumVariance_AGP_20_03              | 0.0107 | 0.0298 | 0.1240 | -1.5018 |
| Cytoplasm_Texture_Variance_AGP_20_01                 | 0.0122 | 0.0304 | 0.1100 | -1.4230 |
